1 **Forkhead transcription factor FKH-8 is a master regulator of primary cilia**  
2 **in *C. elegans***

3

4

5 Rebeca Brocal-Ruiz<sup>1</sup>, Ainara Esteve-Serrano<sup>1</sup>, Carlos Mora-Martinez<sup>1</sup>, Juan  
6 Tena<sup>2</sup> and Nuria Flames<sup>1,\*</sup>

7

8 1: Developmental Neurobiology Unit, Instituto de Biomedicina de Valencia IBV-  
9 CSIC, Valencia, 46010, Spain

10 2: Centro Andaluz de Biología del Desarrollo (CABD), Consejo Superior de  
11 Investigaciones Científicas/Universidad Pablo de Olavide, Seville, Spain.

12

13

14

15 \* Correspondence: [nflames@ibv.csic.es](mailto:nflames@ibv.csic.es)

16

17

## 18 **SUMMARY**

19 Cilia, either motile or non-motile (a.k.a primary or sensory), are complex  
20 evolutionary conserved eukaryotic structures composed of hundreds of proteins  
21 required for their assembly, structure and function that are collectively known as  
22 the ciliome. Ciliome mutations underlie a group of pleiotropic genetic diseases  
23 known as ciliopathies. Proper cilium function requires the tight coregulation of  
24 ciliome gene transcription, which is only fragmentarily understood. RFX  
25 transcription factors (TF) have an evolutionarily conserved role in the direct  
26 activation of ciliome genes both in motile and non-motile cilia cell types. In  
27 vertebrates, FoxJ1 and FoxN4 Forkhead (FKH) TFs work with RFX in the direct  
28 activation of ciliome genes, exclusively in motile cilia cell-types. No additional  
29 TFs have been described to act together with RFX in primary cilia cell-types in  
30 any organism. Here we describe FKH-8, a FKH TF, as master regulator of the  
31 primary ciliome in *Caenorhabditis elegans*. *fkh-8* is expressed in all ciliated  
32 neurons in *C. elegans*, binds the regulatory regions of ciliome genes, regulates  
33 ciliome gene expression, cilium morphology and a wide range of behaviours  
34 mediated by sensory cilia. Importantly, we find FKH-8 function can be replaced  
35 by mouse FOXJ1 and FOXN4 but not by members of other mouse FKH  
36 subfamilies. In conclusion, our results show that RFX and FKH TF families act  
37 as master regulators of ciliogenesis also in sensory ciliated cell types and  
38 suggest that this regulatory logic could be an ancient trait predating functional  
39 cilia sub-specialization.

40

## 41 **Keywords**

42 cilium, transcriptional regulation, FKH, RFX, terminal differentiation, *C. elegans*

## 43 INTRODUCTION

44

45 Eukaryotic cilia are complex and highly organized organelles defined as  
46 specialized membrane protrusions formed from a stereotyped assembly of  
47 microtubules. Cilia are composed of hundreds of proteins, required for their  
48 assembly, structure and function, which are collectively known as the ciliome  
49 (**Figure 1A**). Cilia can be classified into motile or non-motile based on their  
50 function and structure: motile cilia are responsible for propelling cells or  
51 generating fluid flow while non-motile (a.k.a primary or sensory) cilia function as  
52 cellular antennae to sense extracellular stimuli (Choksi et al., 2014). Cilia  
53 appeared early in eukaryotic evolution and it is thought that ancient cilia  
54 displayed mixed motile and sensory functions (Mitchell, 2017). In multicellular  
55 invertebrates, primary and motor cilia are restricted to specific cell types. In  
56 contrast, in vertebrates, primary cilia are present almost in every cell, including  
57 neurons, while motile cilia are present only in specialized cell types.

58 Most ciliome components are shared between motile and primary cilia and are  
59 referred as "core" ciliome (**Figure 1A**). In addition, motile cilia usually contain  
60 specialised axonemal dyneins and other motile-specific components while  
61 membrane of sensory cilia is decorated with receptors that trigger downstream  
62 signalling cascades when they are activated by small molecules, mechanical  
63 perturbations, or radiation.

64 The importance and wide range of cilia functions are underscored by the large  
65 number of congenital disorders caused by mutations in genes coding for ciliome  
66 components, which are collectively called ciliopathies (Andreu-Cervera et al.,  
67 2021; Horani and Ferkol, 2021; Lucas et al., 2020; Tobin and Beales, 2009).

68 These disorders cause a broad spectrum of symptoms including retinal

69 degeneration, polycystic kidney, deafness, polydactyly, brain and skeletal  
70 malformations, infertility, morbid obesity and mental retardation. Importantly,  
71 there are still many "orphan ciliopathies", which correspond to congenital  
72 disorders classified as ciliopathies by phenotype but with yet unidentified causal  
73 mutations. Genetic variants lying in coding genes (including mutations in the  
74 ciliome) are easier to identify as causal mutations, however, most variants  
75 associated to human diseases lie in the non-coding genome. It is currently  
76 thought that some of these non-coding variants act as regulatory mutations  
77 affecting gene expression. Thus, regulatory mutations affecting ciliome gene  
78 expression might underlie many orphan ciliopathies, understanding the  
79 molecular mechanisms that ensure correct co-regulation of ciliome genes is  
80 then of utmost importance.

81 Little is known about the direct transcriptional co-regulation of ciliome gene  
82 expression (Choksi et al., 2014; Lewis and Stracker, 2020; Thomas et al.,  
83 2010). In 2000, pioneer work in *Caenorhabditis elegans* identified DAF-19, an  
84 RFX family transcription factor (TF), as a direct regulator of ciliome gene  
85 expression in the ciliated sensory neurons (Swoboda et al., 2000). This work  
86 was followed by numerous reports on the role of different members of the RFX  
87 TF family as direct ciliome regulators both in primary and motile cilia cell types  
88 in several animal models including *Drosophila melanogaster*, *Danio rerio*,  
89 *Xenopus laevis* and *Mus musculus* (Ashique et al., 2009; Bonnafe et al., 2004;  
90 Chung et al., 2012; Dubruille et al., 2002; Liu et al., 2007). FOXJ1, an ancient  
91 member of the Forkhead family, also acts as a direct activator of ciliome  
92 transcription in several vertebrates, but its role is limited to cell types containing  
93 motile cilia (Brody et al., 2000; Chen et al., 1998; Stubbs et al., 2008; Yu et al.,

94 2008). Thus, currently additional TFs acting together with RFX TFs in the direct  
95 regulation of the ciliome in sensory cilia cell types are completely unknown in  
96 any organism.

97 Here, we take advantage of the amenability of *C. elegans* for genetic studies to  
98 understand the transcriptional regulatory logic of the non-motile primary  
99 ciliome. *C. elegans* contains sensory but not motile cilia. In hermaphrodites,  
100 sensory cilia are found in 25 out of the 118 neuronal types known as the ciliated  
101 sensory system (Scholey, 2007) (**Figure 1B**). We find that FKH-8, a FKH TF, is  
102 expressed in all ciliated sensory neurons in *C. elegans*, with an onset of  
103 expression concomitant to the start of ciliome gene expression. Chromatin  
104 immuno-precipitation and sequencing (ChIP-seq) data analysis shows that  
105 FKH-8 binds to a broad range of ciliome genes, at locations often near X-box  
106 sites, which are recognized by DAF-19/RFX. *fkh-8* mutants show decreased  
107 ciliome reporter gene expression, cilia morphology abnormalities and deficits in  
108 a wide range of behaviours mediated by sensory cilia. In addition, we find *fkh-*  
109 *8*/FKH and *daf-19*/RFX act synergistically in the regulation of ciliome genes.  
110 Finally, we show that mouse FoxJ1 and FoxN4, two ancient FKH TFs known to  
111 directly regulate ciliome expression in vertebrate motile-cilia cell types, rescue  
112 *fkh-8* mutant expression defects. This functional conservation is not observed  
113 with members of other FKH sub-families. Our results identify FKH-8 as the first  
114 TF acting together with RFX TFs in the direct regulation of the ciliome in  
115 sensory-ciliated cells and suggest that this function could be evolutionary  
116 conserved in vertebrates. Taken together, a global ciliome regulatory logic  
117 starts to emerge in which RFX and FKH TFs could act together in the direct  
118 regulation of ciliome gene expression both in cell types containing motile or

119 primary cilia. Considering that ancestral eukaryotic cilium is proposed to  
120 combine motile and sensory functions, we speculate that RFX / FKH regulatory  
121 module might represent the ancestral state of eukaryotic ciliome gene  
122 regulation.

123

## 124 RESULTS

### 125 Persistent enhancer activity of ciliome genes in *daf-19*/RFX mutants

126 The activity of enhancers for ciliome genes bearing X-boxes is dramatically  
127 reduced in *daf-19(m86)* null mutants. However, for several ciliome fluorescent  
128 reporters, some residual activity has been anecdotally reported (Burghoorn et  
129 al., 2012; Chu et al., 2012; Efimenko et al., 2005; Haycraft et al., 2001; Stasio et  
130 al., 2018; Swoboda et al., 2000). As *daf-19* is the only RFX TF coded in the *C.*  
131 *elegans* genome, we reasoned that persistent ciliome enhancer activity in *daf-*  
132 *19(m86)* null mutants would underscore the presence of additional TF families  
133 working in concert with DAF-19. Based on previous data, we selected  
134 enhancers and built fluorescent reporters for ten phylogenetically conserved  
135 and broadly expressed core cilia components: five intraflagellar transport (IFT)  
136 genes (*che-11*, *osm-1*, *ift-20*, *che-13*, *osm-5*); the transition zone  
137 transmembrane genes *tmem-107* and *mks-1*; a Tub gene involved in receptor  
138 trafficking (*tub-1*); the dynein-component *xbx-1* and the ubiquitin protein ligase  
139 *peh-1* (**Figure 1A**). Human orthologs for several of these genes are linked to  
140 ciliopathies (Horani and Ferkol, 2021; Mukhopadhyay et al., 2005; Thevenon et  
141 al., 2016). All fluorescent reporters contain at least one experimentally validated  
142 X-box (**Figure S1**). In *wild type* worms, all these reporters show broad activity in  
143 the ciliated system, with mean reporter expression in at least 30 ciliated  
144 neurons, except for *mks-1* and *osm-5* reporters that showed expression in less  
145 than 20 cells, suggesting other enhancers outside the analysed sequences  
146 might drive expression in additional ciliated neurons (**Figure 1C** and **Figure**  
147 **S2**). To avoid dauer entry of *daf-19(m86)* null animals, we analysed reporter  
148 expression in *daf-19(m86); daf-12(sa204)* double mutants and added *daf-12*

149 (*sa204*) single mutant analysis as additional control (**Supplementary File 1**).  
150 As expected, *daf-19(m86); daf-12 (sa204)* double mutants show a dramatic  
151 decrease in the number of neurons positive for each reporter (**Figure 1C** and  
152 **Figure S2**). Importantly, all reporters except *tmem-107*, *mks-1* and *osm-5*,  
153 which correspond to the shortest constructs, show persistent expression in  
154 some neurons (**Figure 1C**, **Figure S2** and **Supplementary File 1**). We  
155 hypothesised that these short constructs might lack binding sites for additional  
156 TFs working with DAF-19. Indeed, we find that shorter versions of *xbx-1* and  
157 *peii-1* reporter constructs are more affected by *daf-19* mutation than  
158 corresponding longer constructs, consistent with shorter sequences lacking  
159 additional regulatory information (**Figure 1C**).  
160 Unexpectedly, we find that *daf-12* itself has a small but significant effect on the  
161 expression of several reporters (namely, *che-13*, *ift-20*, *osm-1*, *mks-1* and  
162 *tmem-107*) (**Supplementary File 1**), suggesting a possible role for this nuclear  
163 hormone receptor (NHR) TF in ciliome expression. Altogether our data strongly  
164 suggests that additional TF or TFs act together with DAF-19 to directly activate  
165 core ciliome gene expression.



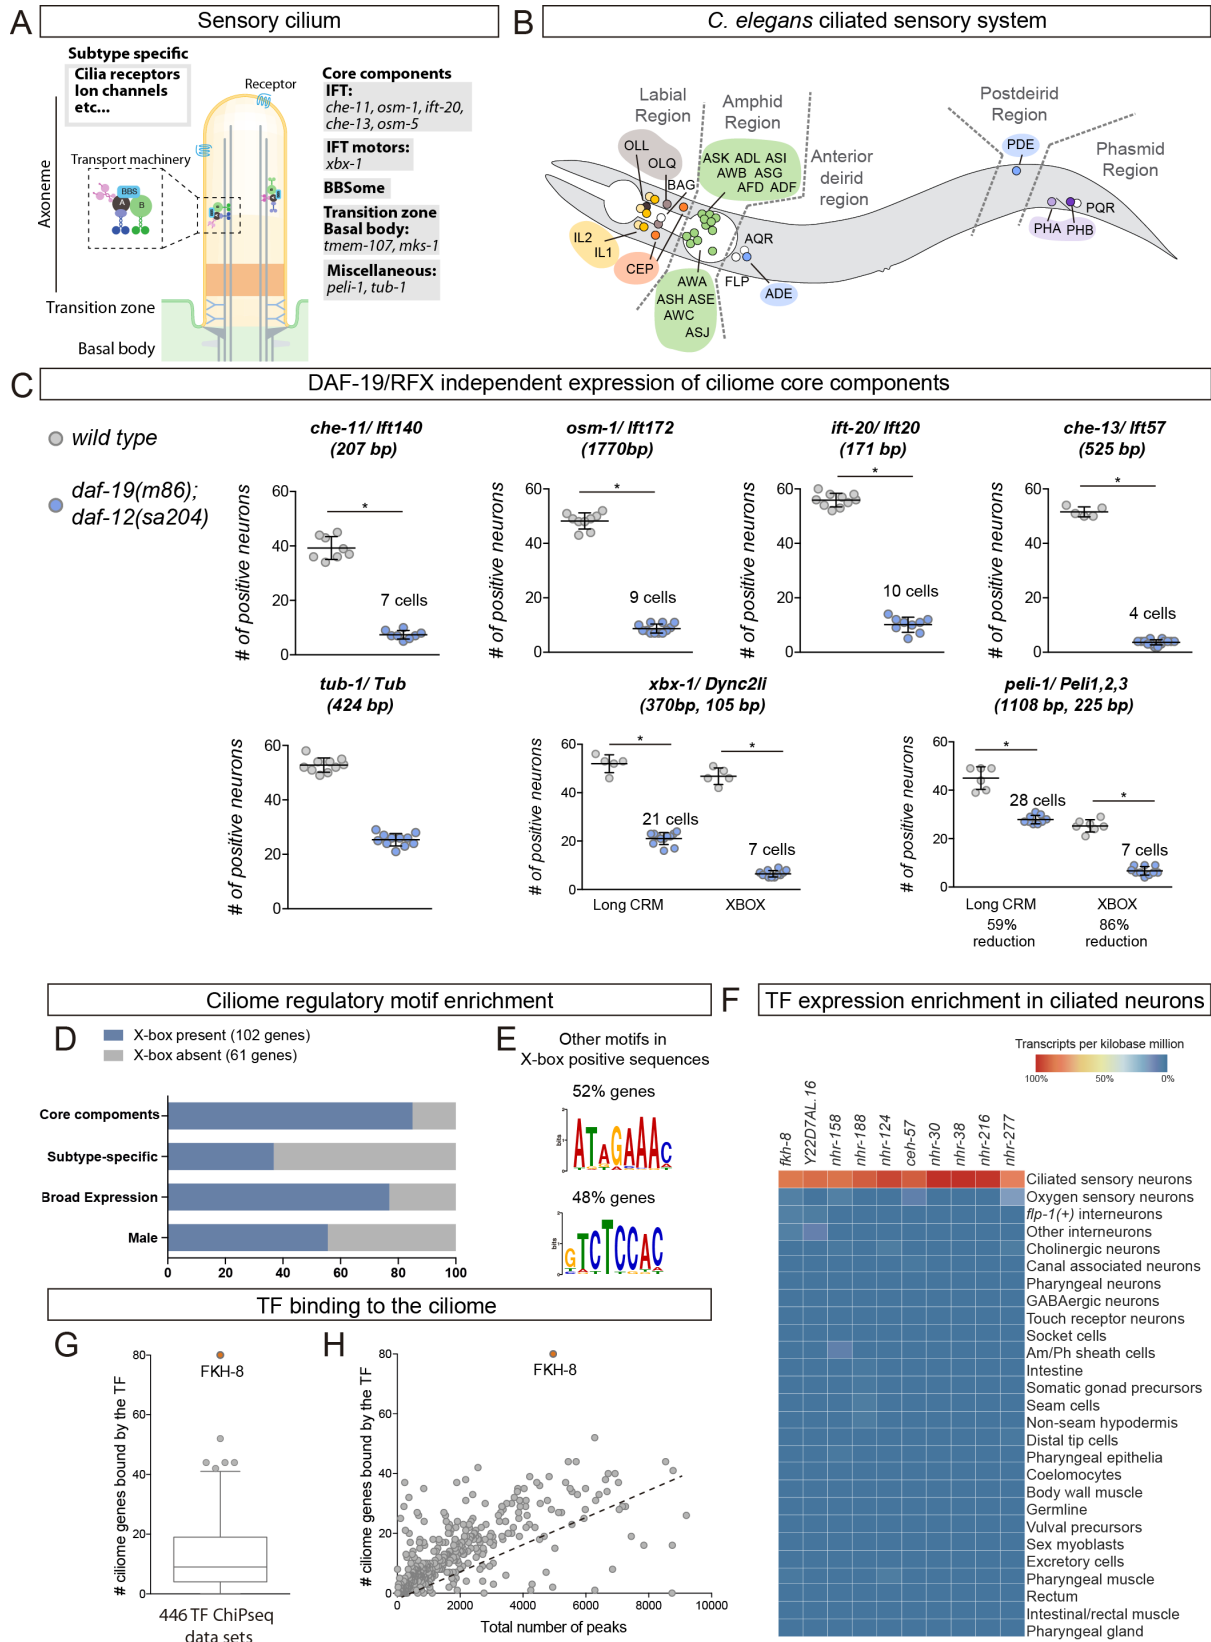

Figure 1

**Figure 1. FKH-8 is a candidate regulator of ciliome gene expression in *C. elegans*.**

A) Schema for a sensory cilium. Cilia components (ciliome) can be divided into core and subtype specific categories. Genes whose reporters are analysed in panel C are indicated by their function.

B) Left lateral view of *C. elegans* hermaphrodite ciliated system. Sixty ciliated neurons from 25 different classes are distributed in 5 distinct anatomical regions.

C) Ciliome core components show persistent expression in double *daf-12(sa204)*, *daf-19(m86)* null mutants. Each dot represents the total number of reporter-positive neurons in a single animal. Mean and standard deviation are represented. The mean number of remaining reporter-positive neurons in double *daf-12*, *daf-19* null mutants is indicated. See **Supplementary File 1** for raw data, *daf-12(sa204)* single mutant scorings and sample sizes and **Supplementary figure 2** for additional reporter scorings.

D) DAF-19/RFX motifs (X-box) are enriched in regulatory sequences of core and broadly expressed ciliome genes. See **Supplementary figure 3** for additional enriched motifs.

E) Motifs enriched in regulatory sequences of ciliome genes containing X-box sites, potential TF binding to these motifs is unknown.

F) sc-RNA-seq data analysis (Cao et al., 2017) identifies 10 TFs specifically enriched in ciliated sensory neurons. These TFs belong to FKH, ZF, NHR and HD families. See **Supplementary figure 3** for detailed description of TF expression in each ciliated neuron type.

G) ChIP-seq data analysis of 259 available TFs shows that FKH-8 ranks first in direct binding to genes of the ciliome list. See **Supplementary figure 3** for core ciliome or subtype specific binding.

H) Correlation of total number of peaks and ciliome-list genes bound by TFs shows FKH-8 behaves as an outlier, demonstrating high binding to ciliome genes is not merely due to the high number of FKH-8 binding-events.

167

168 **Identification of FKH-8 as candidate regulator of ciliome gene expression**

169 We reasoned that similar to *daf-19*, additional regulators of cilia gene  
170 expression could act broadly on many genes coding for ciliome components  
171 and in many different ciliated neuron types. Thus, to identify these putative  
172 candidates, we combined three strategies: *cis*-regulatory analysis of the ciliome  
173 genes, TF expression enrichment in the sensory ciliated system and TF binding  
174 to putative regulatory regions of the ciliome genes.

175 We built a manually curated list of 163 cilium effector genes (See materials and  
176 methods and **Supplementary File 2**). This list can be divided in four categories:  
177 1) 73 "*core components*" present in all types of cilia and thus expressed by all  
178 ciliated neurons in *C. elegans*. Core components include IFT particles, kinesins,  
179 dyneins, BBSome complex, etc; 2) 68 "*Subtype specific*" genes, that code for  
180 channels or receptors located in cilia that are expressed in a neuron type  
181 specific manner, providing neuron type specific functions; 3) 13 "*Broad*  
182 *expression*" genes, specifically expressed within the ciliated system but not

183 associated with a well-defined core cilia functions and 4) 9 "*Male*" genes that  
184 code for genes with male-specific cilia functions (**Supplementary File 2**).

185 *De novo* motif enrichment analysis using the promoters of these ciliome genes  
186 identified previously known RFX consensus binding sites (X-box motif). In  
187 agreement with published results, X-box motifs are preferentially associated to  
188 "*Core*" and "*Broadly expressed*" ciliome genes (**Figure 1D**) (Burghoorn et al.,  
189 2012; Efimenko et al., 2005; Swoboda et al., 2000). An additional motif  
190 matching the pro-neural bHLH TF *lin-32/Atoh1* is present in 28% of the genes,  
191 with no particular bias to any ciliome category (**Figure S3**). The pro-neural  
192 binding site might reflect the neuronal nature of this gene set, as in *C. elegans*  
193 cilia are only present in neurons. Motif enrichment analysis limited only to the  
194 102 genes containing predicted X-box sites identified two additional motifs  
195 (**Figure 1E**). Neither of both motifs significantly match known Position Weight  
196 Matrices for TFs. In contrast to the X-box, which is highly specific, TF binding  
197 motifs (TFBM) for many TF families are often short and degenerate, thus they  
198 appear widely in the genome and provide low information content. This feature  
199 might explain the failure to find enriched motifs for additional TFs in ciliome  
200 gene regulatory regions.

201 As an alternative to motif enrichment analysis, we turned to TF expression  
202 enrichment. We hypothesized that TFs acting broadly on sensory cilia gene  
203 expression could show enriched expression in the sensory ciliated neurons.  
204 Using available single cell RNA expression data (sc-RNAseq) from the second  
205 larval stage (Cao et al., 2017), we retrieved the expression pattern of 861 *C.*  
206 *elegans* transcription factors (Narasimhan et al., 2015). Ten transcription factors  
207 are specifically enriched within the ciliated sensory neurons compared to other

208 neuron types or non-neuronal tissues (**Figure 1F**). Using an independent set of  
209 sc-RNAseq data from young adult (Taylor et al., 2021), only FKH-8 expression  
210 is detected in all 25 different types of sensory ciliated neurons (**Figure S3**),  
211 suggesting it could be a good candidate to work together with DAF-19.  
212 Finally, we interrogated 446 published ChIP-seq datasets, corresponding to 259  
213 different TFs (including FKH-8 but not DAF-19), for nearby binding to the  
214 ciliome gene list (**Supplementary File 2**). We find FKH-8 behaves very  
215 differently from the rest of TFs with at least one FKH-8 binding peak associated  
216 to 49% of the genes on the ciliome gene list (**Figure 1G-H**). FKH-8 binds both  
217 core components and subtype specific ciliome genes (**Figure S3**), although,  
218 similar to X-box motifs, FKH-8 binding is significantly more prevalent for core  
219 ciliome genes (75% compared to 22% binding to subtype genes). Thus, both  
220 sc-RNAseq and ChIPseq data analysis pinpoint FKH-8 as a good candidate TF  
221 to directly control ciliome gene expression.

222

### 223 **FKH-8 is expressed in all ciliated sensory neurons**

224 FKH-8::GFP fosmid expression at young adult stage is detected in all ciliated  
225 sensory neurons, as assessed by co-localization with the *ift-20* core ciliome  
226 reporter (**Figure 2A, B and Supplementary File 1**). Only three non-ciliated  
227 neurons, PVD, VC4 and VC5 show FKH-8 expression, while no expression is  
228 detected in non-neuronal tissues. *C. elegans* male nervous system contains  
229 additional ciliated sensory neurons, mostly in the tail, which also express FKH-8  
230 (**Figure 2B**). During embryonic development, there is a similar overlap between  
231 FKH-8 and *ift-20* reporters (**Figure 2C and S4**). Correlation between *fkh-8*, *ift-*  
232 *20* and *daf-19* expression during development is also observed using Uniform

233 Manifold Approximation and Projection (UMAP) representation of embryonic sc-  
234 RNA-seq data (Packer et al., 2019) (**Figure 2D and S4**). In addition, there is a  
235 high gene expression correlation for the 73 core ciliome genes and *daf-19* or  
236 *fkh-8* expression but not with other TFs (**Figure S4**). Thus, our analysis shows  
237 that FKH-8 is expressed almost exclusively in the whole ciliated sensory system  
238 and its developmental expression correlates with core ciliome gene expression.

239

#### 240 **FKH-8 genomic binding is enriched in ciliome genes**

241 Next, we extended FKH-8 ChIPseq data analysis to the whole genome. FKH-8  
242 binds a total of 5035 genomic regions assigned to 3,987 genes. Most peaks are  
243 associated to promoter regions (58,65%). Gene ontology analysis of FKH-8  
244 bound genes shows enrichment for cilia functions or dauer regulation (which is  
245 also dependent on cilia integrity) (**Figure 2E**).

246

247

248 DNA consensus sequences bound by FKH-8 have not been experimentally  
249 determined. FKH TF family binds the canonical consensus RYMAAYA (Pierrou  
250 et al., 1994) and an alternative motif, termed FKH-like (FHL), characterized by a  
251 GACGC core sequence (Nakagawa et al., 2013). *De novo* motif enrichment  
252 analysis of FKH-8 ChIP-seq peaks does not show any match for FKH canonical  
253 binding site but identifies a motif that highly resembles the FHL motif (**Figure**  
254 **2F**). This motif, present in 27% of the peaks, is enriched at central positions  
255 suggesting it could act as FKH-8 primary binding motif (**Figure 2F**).

256 We noticed that eight out of the twelve functional X-boxes present in the core  
257 ciliome reporters analysed in Figure 1C overlap with FKH-8 ChIP-seq peaks

258 **(Figure S1)**. Thus, we next looked for DAF-19 binding motif enrichment in FKH-8  
259 bound regions. 21% of FKH-8 peaks contain at least one match for the DAF-19  
260 position weight matrix **(Figure 2G)**. Importantly, predicted X-boxes are  
261 preferentially found also at central locations, suggesting they could be in close  
262 proximity to FKH-8 bound sites **(Figure 2G)**. DAF-19 binding sites are less  
263 significantly or not significantly enriched in ChIP-seq datasets for other FKH TFs  
264 **(Figure S4)**, suggesting specific co-binding of DAF-19 and FKH-8.

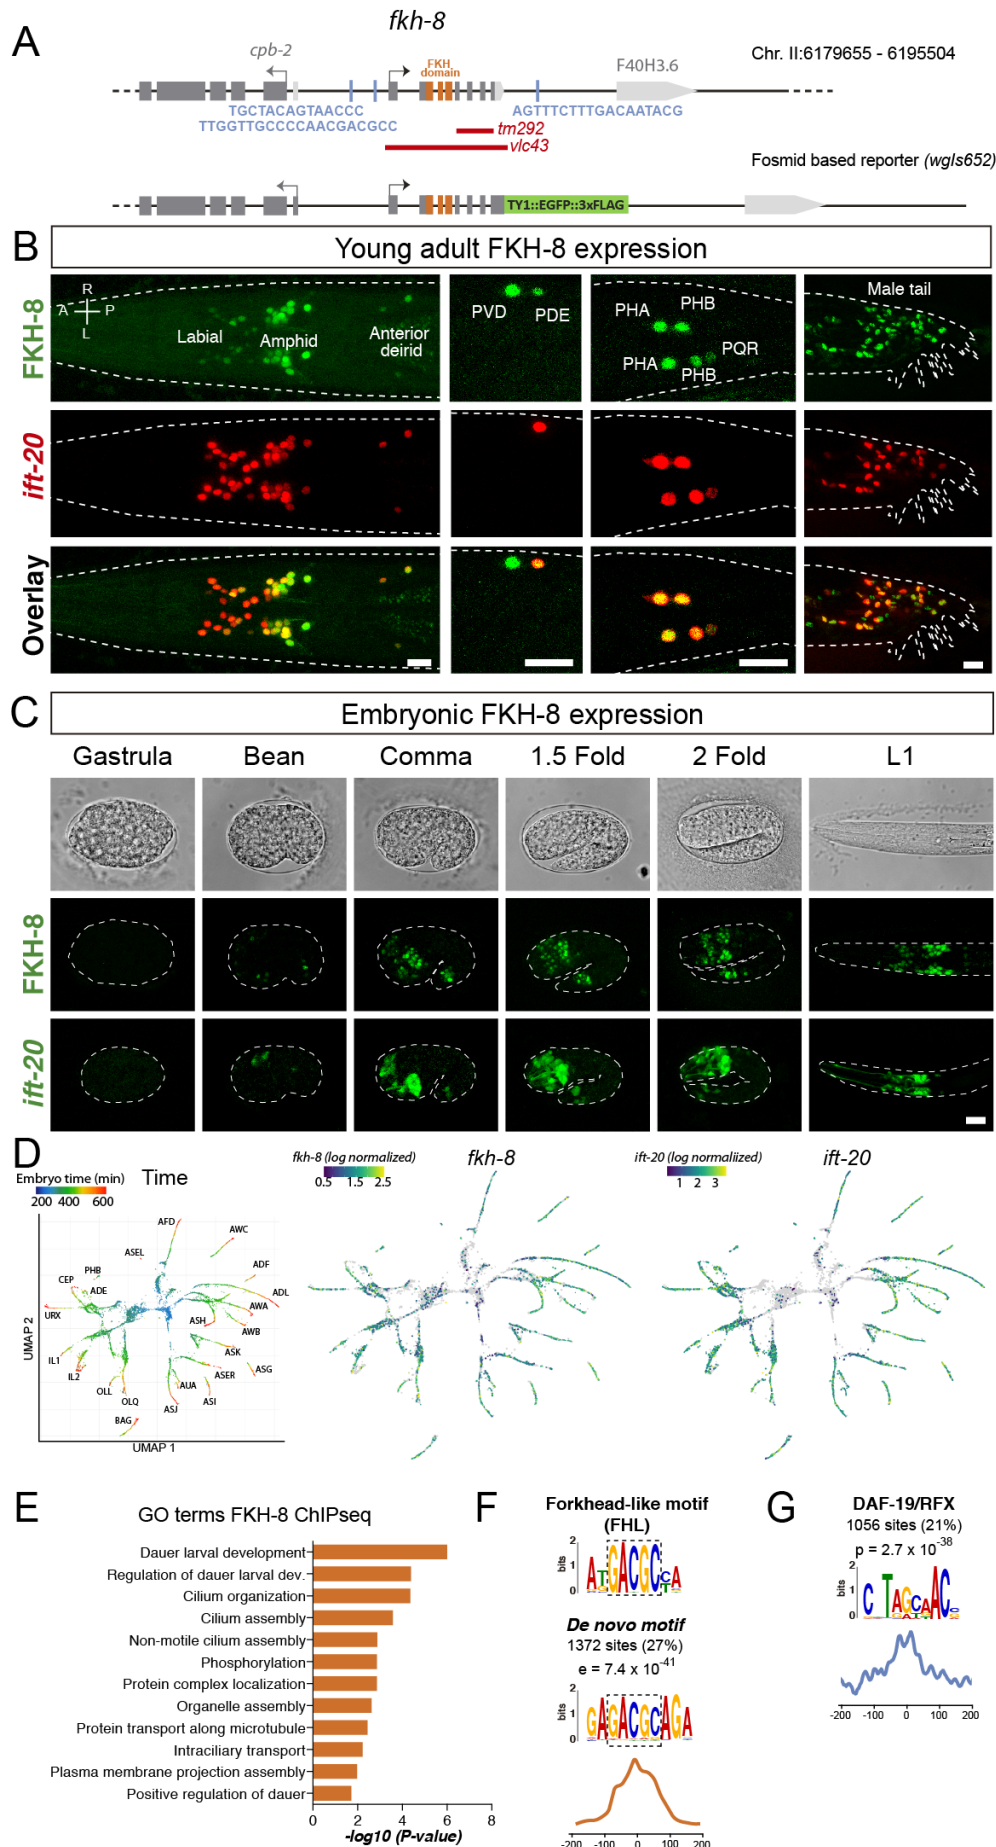

**Figure 2. FKH-8 expression correlates with ciliated neuron differentiation.**

A) *fkh-8* locus (top) and fosmid based *fkh-8* reporter (bottom). Grey boxes represent exons and orange boxes correspond to exons coding for the FKH DNA binding domain. Putative *daf-19*/RFX binding sites are depicted with a blue bar. Red lines indicate extension for the corresponding deletion alleles.

B) Dorso-ventral views of young adult animals expressing both the fosmid-based FKH-8::GFP reporter (in green) and an integrated reporter for the panciliary marker *ift-20* (in red). A: anterior, P: posterior, R: right, L: left. Scale bar = 10  $\mu$ m.

C) Embryonic developmental expression of FKH-8::GFP matches in time and space panciliary reporter *ift-20::gfp* expression. Scale bar = 10  $\mu$ m. See **Supplementary figure 4** for embryonic co-localization between FKH-8::GFP and *ift-20::tagrfp* reporter.

D) Embryonic sc-RNA-data (Packer et al., 2019) from *C. elegans* ciliated neurons and their progenitor cells. Pseudo-time (left panel) shows the maturation trajectory of ciliated neurons that coincides with increasing *fkh-8* (centre) and *ift-20* (right) expression. See **Supplementary figure 4** for *daf-19* expression analysis and quantification of gene expression correlation.

E) Genes bound by FKH-8 enrich Gene Ontology terms related to cilia regulated processes and/or functions. Data correspond to adjusted p-value.

F) *De novo* motif analysis of FKH-8 ChIP-seq data identifies a motif present in 27% of the peaks, enriched at central peak positions, that matches an FHL-like motif.

G) DAF-19/RFX binding motifs (PWM M1534\_1.02) are present in 21% of the FKH-8 bound regions and are enriched at central positions. See **Supplementary figure 4** for similar analysis on additional FKH ChIP-seq data sets.

266 ***fkh-8* mutants show defects in ciliome reporter gene expression**

267 The only available *fkh-8* mutation, *tm292*, is a deletion downstream the FKH  
268 DNA binding domain, suggesting it could act as a hypomorphic allele (**Figure**  
269 **2A**). Thus, we built *fkh-8(vlc43)*, a null deletion allele that removes the whole  
270 *fkh-8* locus (**Figure 2A**). We selected eight reporters for six genes that code for  
271 core cilia components and that overlap with FKH-8 ChIP-seq peaks (**Figure S1**)  
272 and analysed their expression both in *fkh-8(tm292)* and *fkh-8(vlc43)* mutants.  
273 Both *fkh-8* mutant alleles show significant expression defects in all reporters  
274 except for *tub-1/Tub* and the long *peli-1/Peli1,2,3* reporter. Phenotypes are  
275 often more penetrant in *fkh-8(vlc43)* null allele than in the *fkh-8(tm292)*  
276 supporting the hypomorphic nature of *tm292* allele (**Figure 3A and**  
277 **Supplementary File 1**). The expression of each reporter is affected in specific  
278 subpopulations of ciliated neurons with some residual reporter expression found  
279 in all cases (**Figure 3A**). Lack of fluorescence reporter expression in *fkh-8*  
280 mutants reflects enhancer activity defects and not the absence of the ciliated  
281 neurons *per se*, as in *fkh-8* mutants *tub-1/Tub* and the long *peli-1/Peli1,2,3*



282 reporters are expressed in 53 and 46 ciliated neurons respectively  
283 (**Supplementary File 1**), similar to *wild type* expression levels.

284 *fkh-8(vlc43)* animals show missing *ift-20* expression in ten neurons including the  
285 four pairs of dopaminergic ciliated mechanosensory neurons (CEPV, CEPD,  
286 ADE and PDE). Expression in *fkh-8(vlc43)* animals of *fkh-8* cDNA under the  
287 control of a *dat-1* dopaminergic specific promoter, which is unaffected in *fkh-8*  
288 mutants, is able to rescue *ift-20* reporter expression, consistent with a cell  
289 autonomously role of *fkh-8* in the regulation of ciliome gene expression  
290 (**Supplementary File 1**, see also **Figure 7**).

291 Next, we complemented the TF mutant analysis with *cis*-regulatory mutant  
292 analysis. We focused on *ift-20* and short *xbx-1* reporters which both overlap  
293 with FKH-8 Chip-seq peaks (**Figure S5**). Three independent transgenic lines  
294 with point mutations for FKH binding sites show broad expression defects both  
295 for *ift-20* and *xbx-1* reporters (**Figure 3B and Supplementary File 1**). *cis*-  
296 mutation expression defects are stronger than the ones observed for *fkh-8*  
297 mutant alleles suggesting either other FKH factors can compensate the lack of  
298 *fkh-8* or that *cis*-mutations could affect the binding of other TFs in addition to  
299 FKH-8.

300 In summary, our *cis* regulatory and *fkh-8* mutant analyses unravel a cell  
301 autonomous role for FKH-8 in the regulation of ciliome gene expression.

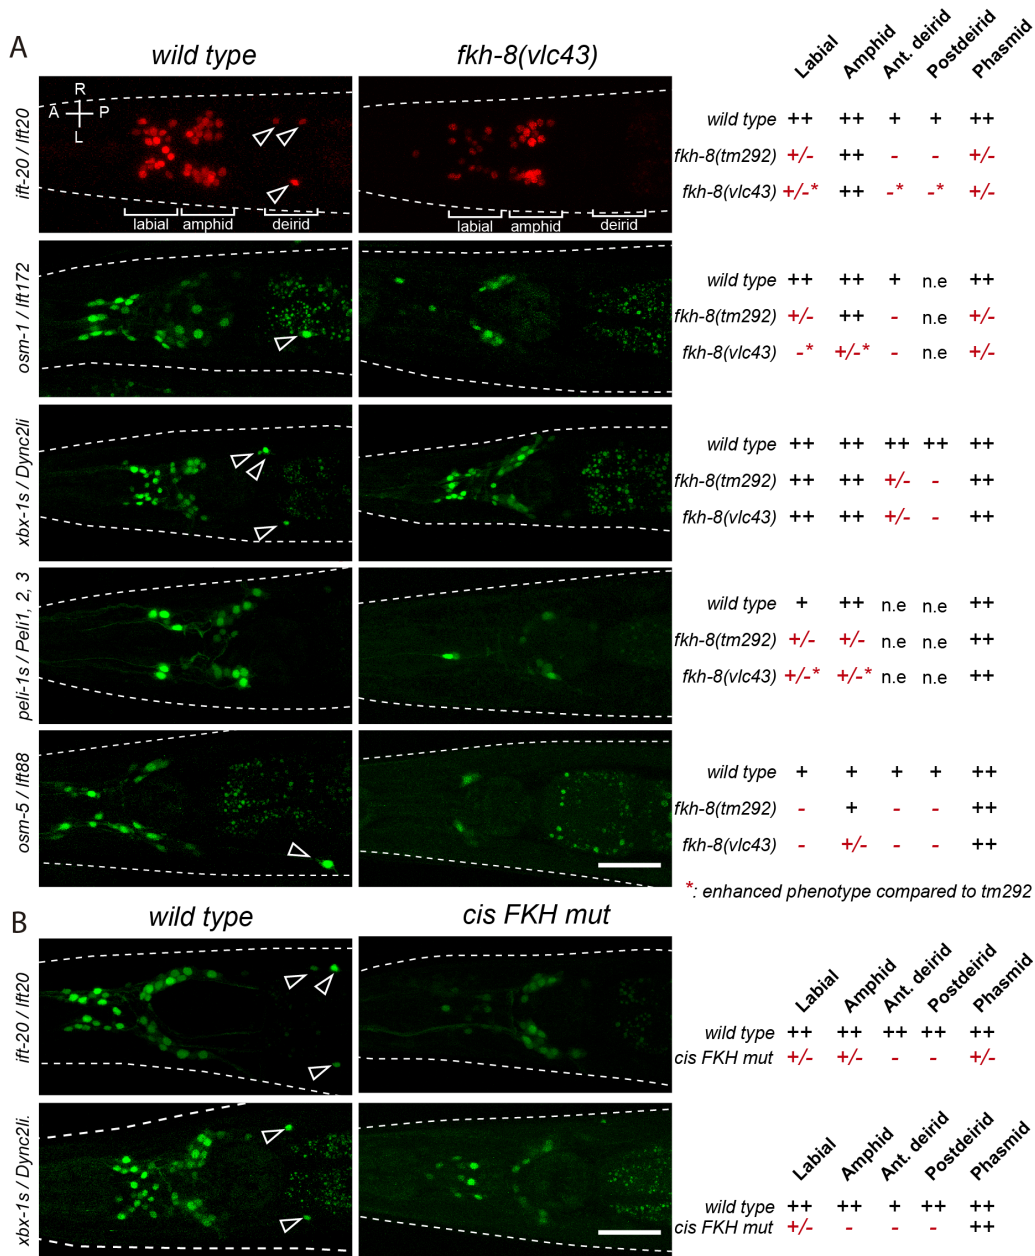

Figure 3

**Figure 3. FKH-8 TF and FKH-binding sites are required for correct core ciliome gene reporter expression.**

A) Dorso-ventral images from young adult heads expressing different core ciliome gene reporters in *wild type* and *fkh-8(vlc43)* null mutant animals. Significant expression defects in 5 distinct anatomical regions for both *tm292* and *vlc43* alleles are summarized in the right panel. *Wild type* reporter expression "++" indicates more than 50% of ciliated neurons in the region express the reporter, whereas "+" indicates expression in less than 50% of the neurons. n.e: not expressed. Statistically significant expression defects appear in red. Expression defect below 50% of *wild type* values are indicated as "+/-" whereas losses higher than 50% are depicted as "-". Enhanced phenotype in *vlc43* mutants compared to *tm292* is marked with an asterisk. A: anterior, P: posterior, R: right, L: left. Scale bar = 25  $\mu$ m. See **Supplementary File 1** for raw scoring data.

B) *Cis*-regulatory mutation of putative FKH sites greatly reduces ciliome gene reporter expression. Representative dorso-ventral images from young adult heads expressing *wild type* or FKH-site-mutated reporters for core ciliome genes *xbx-1* and *ift-20*. Expression defects are summarized on the right as in A). A: anterior, P: posterior, R: right, L: left. Scale bar = 25  $\mu$ m. See **Supplementary Figure 5** and **Supplementary File 2** for *cis*-mutation details.

### 303 **FKH-8 is required for correct cilia morphology**

304 Mutations in several ciliome core component, including *osm-5* and *xbx-1*,  
305 whose reporters are affected in *fkh-8* mutants, show cilium morphology defects  
306 (Blacque et al., 2004; Mukhopadhyay et al., 2007; Perkins et al., 1986; Starich  
307 et al., 1995). One of the most commonly used methods to assess gross cilium  
308 integrity is lipophilic dye staining (like DiD), which in *wild type* animals labels a  
309 subpopulation of amphid and phasmid neurons (Starich et al., 1995).  
310 Unexpectedly, *fkh-8(vlc43)* animals show similar DiD staining than *wild type*  
311 (**Supplementary File 1**).

312 Next, we directly analysed cilium morphology labelling specific subpopulations  
313 of ciliated neurons (**Figure 4**). Cilium length in CEP and AWB neurons is  
314 significantly reduced in *fkh-8(vlc43)* mutants compared to controls, while ADF  
315 neuron cilium length is significantly increased (**Figure 4**). In addition, *fkh-8*  
316 mutants display arborization defects in AWA cilia, while AWC cilia showed no  
317 major defects (**Figure 4**).

318 Thus, FKH-8 is necessary to regulate correct cilium length and morphology in  
319 diverse types of ciliated neurons.

320

321

322

323

324

325

326

327

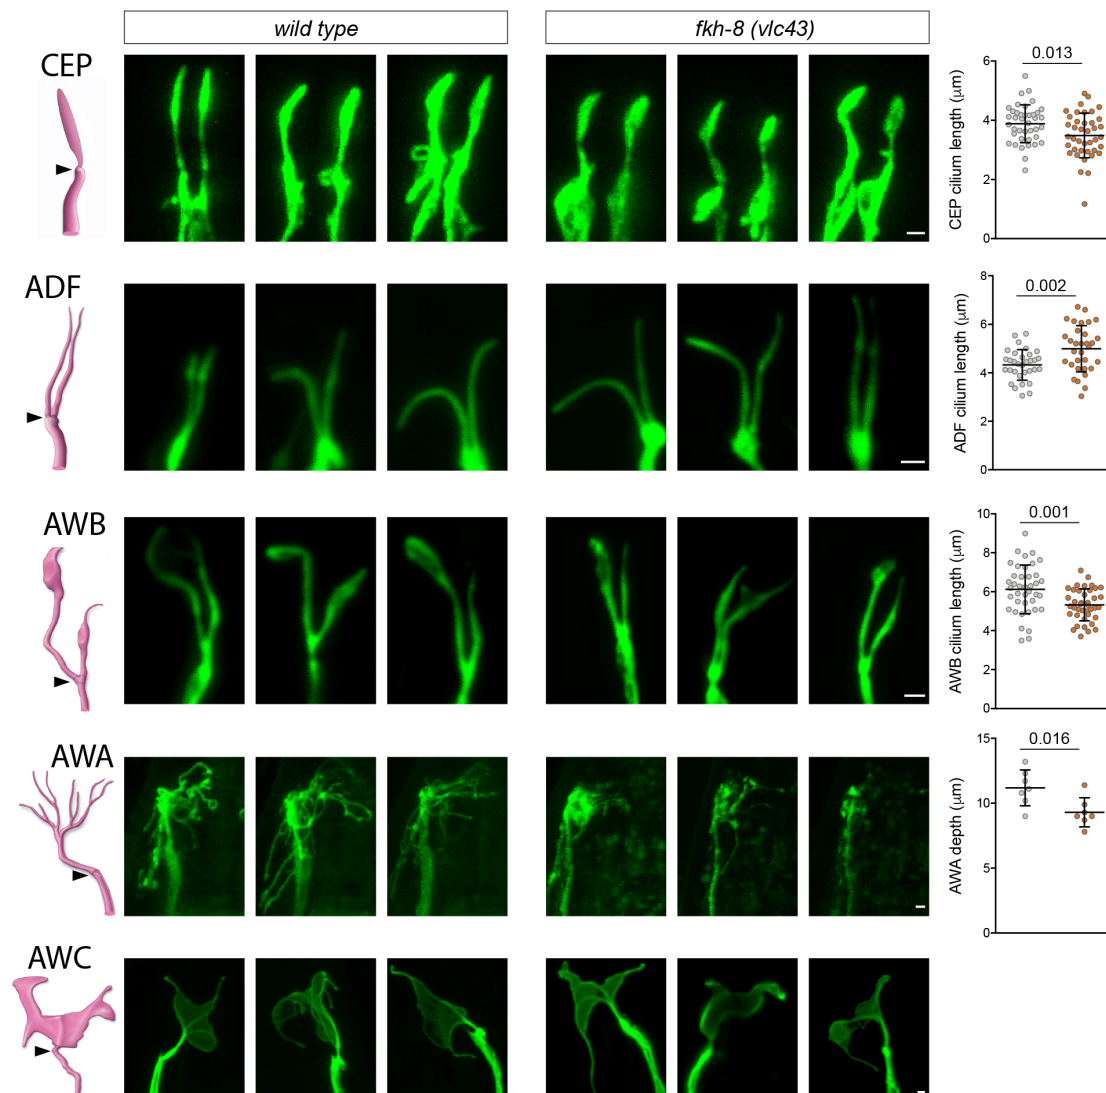

Figure 4

**Figure 4. *fkh-8(vlc43)* null mutants display morphological defects in cilia.**

Integrated reporters unaffected in *fkh-8* mutant are used to label the cilia of several distinct subpopulations of ciliated neurons. CEP: *otIs259(dat-1::gfp)*; ADF: *zdlIs13(tph-1::gfp)*; AWB: *kyls104(str-1::gfp)*; AWA: *pkIs583(gpa-6::gfp)*; AWC: *kyls140(str-2::gfp)*. Panels show representative images from 3 animals in *wild type* and *fkh-8(vlc43)* mutant backgrounds. Cilium length of CEP and AWB neurons is significantly reduced in the absence of FKH-8 whereas ADF cilia length is increased. Depth of AWA cilium arborization is significantly reduced in *fkh-8(vlc43)* null mutants. No major defects are observed in AWC cilia when comparing both genetic backgrounds. Each dot in the graphs represents measures for a single cilium. Mean and standard deviation are represented.

328

329

330

331 ***fkh-8* mutants display defects in a wide range of cilia mediated behaviours**

332 In *C. elegans* cilia are necessary to mediate sensory functions (Bargmann,  
333 1993); thus, we interrogated *fkh-8* mutants with a battery of sensory paradigms.  
334 *fkh-8* mutants respond similarly to *wild type* animals to body gentle touch  
335 stimuli, which are mediated by not ciliated neurons (Chalfie and Sulston, 1981)  
336 (**Figure S6**), discarding general response or locomotory defects in *fkh-8*  
337 mutants. Response to posterior harsh touch, which is redundantly mediated by  
338 ciliated PDE and non-ciliated PVD neurons (Li et al., 2011) is also unaffected in  
339 *fkh-8(tm292)* and *fkh-8(vlc43)* animals, suggesting FKH-8 is not required to  
340 mediate this mechanosensory behaviour (**Figure S6**).

341 We tested two additional mechanosensory behaviours mediated only by ciliated  
342 sensory neurons: basal slowing response, mediated by dopaminergic ciliated  
343 neurons (Sawin et al., 2000) and nose touch, mediated by ASH, FLP and OLQ  
344 ciliated neurons (Kaplan and Horvitz, 1993). No defects on basal slowing  
345 response are found in *fkh-8(vlc43)* null mutants, while both *fkh-8* alleles are  
346 defective for nose touch responses (**Figure 5A, B**). *vlc43* null allele shows  
347 stronger defects than *tm292* allele, supporting the hypomorphic nature of *tm292*  
348 allele (**Figure 5A**).

349 *fkh-8(vlc43)* animals are slightly but significantly dauer constitutive at 27°C  
350 compared to N2 controls (**Figure 5C**), indicating defects in preventing dauer  
351 entry, which is mediated by ADF, ASI and ASG ciliated neurons (Bargmann and  
352 Horvitz, 1991). Moreover, exposure to pheromones induces dauer entry in *fkh-*  
353 *8(vlc43)* animals less efficiently than in *wild type* animals [6 fold induction in *wild*  
354 *type* versus 3 fold induction in *fkh-8(vlc43)* animals] (**Figure 5C**), suggesting

355 FKH-8 is also required for correct dauer entry, which is mediated by ASJ ciliated  
356 neuron (Bargmann and Horvitz, 1991).

357 *fkh-8(vlc43)* null mutants, but not *tm292* allele, show significant odor avoidance  
358 defects to 2-nonanone (AWB mediated) and defective odor attraction to 2-  
359 heptanone (mediated by AWC) (**Figure 5D, E**) (Bargmann et al., 1993;  
360 Sengupta et al., 1996; Troemel et al., 1997). Diacetyl attraction, which is  
361 mediated by AWA, is also decreased in *fkh-8(vlc43)* animals, although not  
362 significantly, due to high standard deviation values (**Figure 5F**).

363 Finally, we tested gustatory responses to NaCl, Sodium Dodecyl Sulfate (SDS)  
364 and copper. *fkh-8* mutants are attracted to NaCl similar to N2 controls, a  
365 response that is mediated mainly by ASE ciliated neurons (Bargmann and  
366 Horvitz, 1991) (**Figure 5G**). In contrast, avoidance response to SDS, mediated  
367 by ASH and ASK ciliated neurons (Hilliard et al., 2002) and avoidance to  
368 copper, mediated by ASH, ASE, ADF and ADL ciliated neurons (Guo et al.,  
369 2015; Sambongi et al., 1999), were significantly reduced both in *fkh-8(vlc43)*  
370 and *fkh-8(tm292)* animals (**Figure 5H, I**).

371 In summary, our battery of behavioural assays reveals FKH-8 is necessary for  
372 the correct response to a wide range of sensory stimuli (mechanical, gustatory  
373 or olfactory) that are mediated by different types of ciliated neurons (ADF, ADL,  
374 ASE, ASG, ASH, ASI, ASJ, ASK, AWB, AWC, FLP and OLQ). Specific  
375 behaviours, such as attraction to NaCl or basal slowing response are sustained  
376 in *fkh-8* mutants, suggesting retained sensory functions for particular neuron  
377 types, even with gene expression or morphological cilia defects (such as  
378 CEPs).

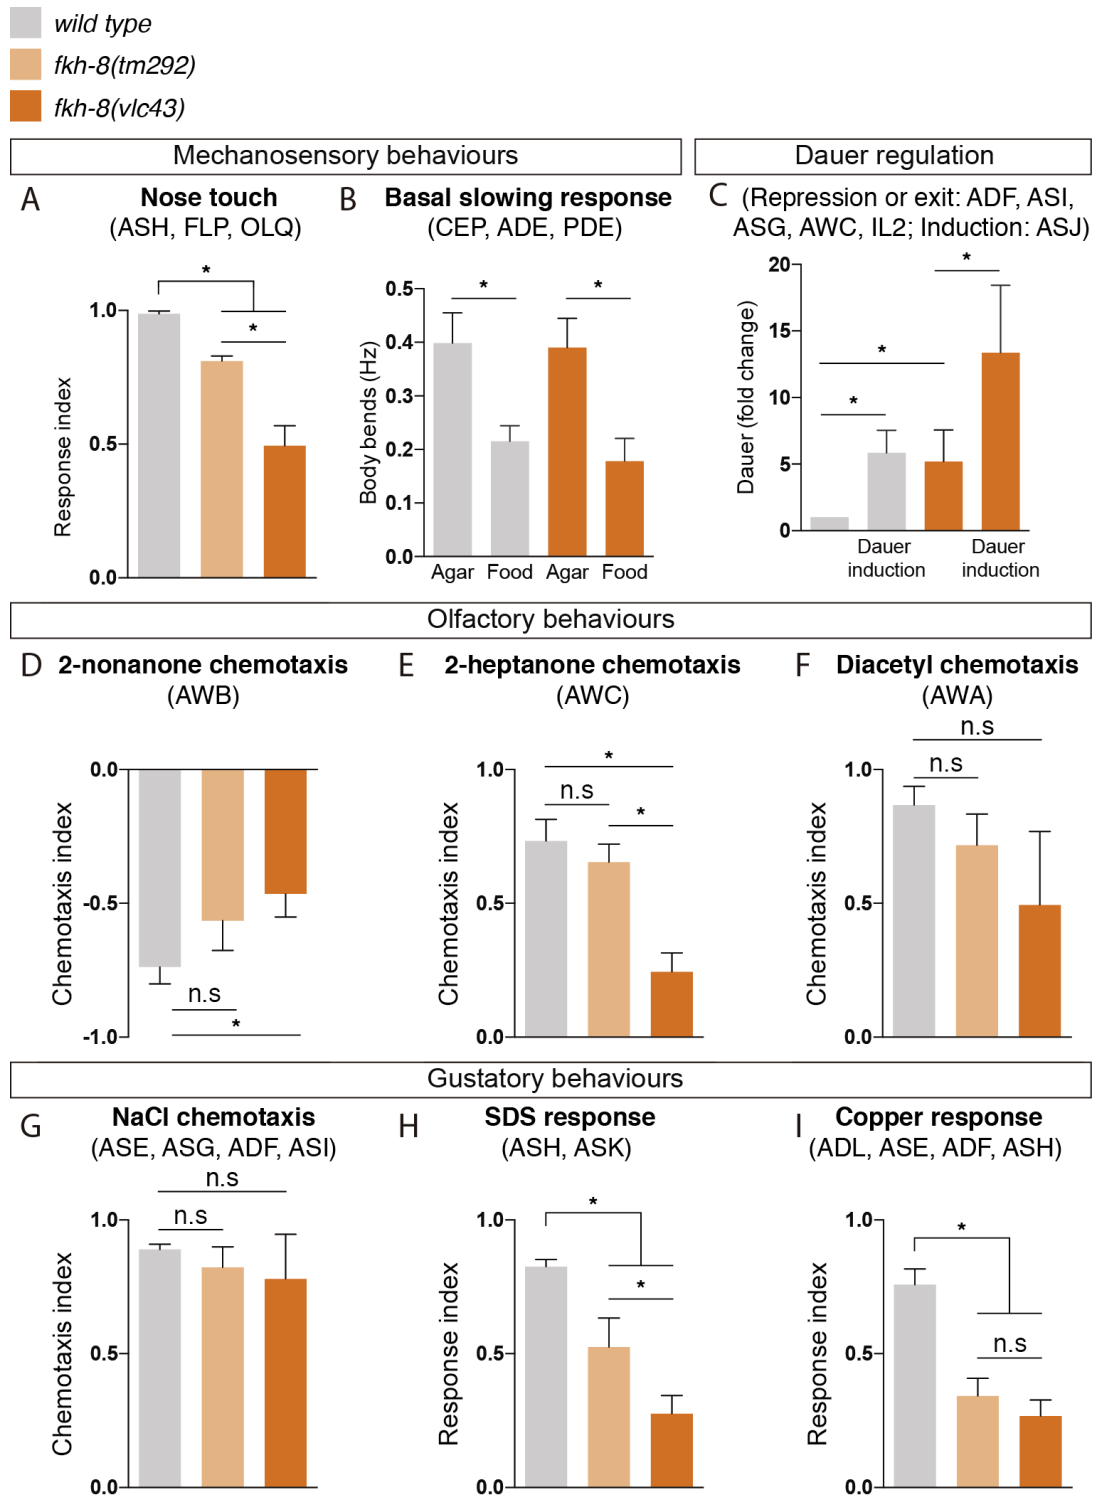

Figure 5

**Figure 5. FKH-8 is required for the correct display of several sensory mediated behaviours.**

A) Mutations in *fkh-8* significantly impair appropriate backward response to nose touch, revealing functionality defects for the ASH, FLP and/or OLQ ciliated neurons. This phenotype is stronger in *fkh-8(vlc43)* null mutants than in the hypomorphic *tm292* allele.

B) Decrease in locomotory rate upon re-entering a bacterial lawn is unaffected in *fkh-8* mutants.

C) *fkh-8* null mutants significantly fail to prevent *dauer* entry. Pheromones induce *dauer* in *fkh-8* mutants, albeit less efficiently than in controls.

D to F) Lack of *fkh-8* significantly impairs olfaction-mediated behaviours towards compounds sensed by ciliated AWB and AWC neurons. Diacetyl response, mediated by AWA, is affected but not to a significant level due to high variability in the response.

G to I) Attractive chemotaxis towards NaCl is unaffected in *fkh-8* mutant animals. Avoidance behaviour towards toxic SDS and copper anions is significantly impaired.

Mean and standard deviation are represented in all graphs. See **Supplementary figure 6** for quantification of non-cilia mediated behaviours and **Supplementary file 3** for raw data and samples' sizes.

380

381 **FKH-8 and DAF-19/RFX act synergistically**

382 FKH-8 binds five different locations in the *daf-19* locus (**Figure 6A**) while *fkh-8*

383 locus contains 3 putative X-box sites (**Figure 2A**), suggesting they could cross-

384 regulate each other's expression. Transcription of *daf-19* locus generates

385 different isoforms that share the carboxyl terminal (Ct) domain and the RFX

386 DNA binding domain but differ in the amino-terminal region (**Figure 6A**). Some

387 of these isoforms are expressed in a mutually exclusive manner: *daf-19d* is

388 specifically expressed in ciliated neurons while *daf-19a/b* isoforms are

389 expressed in the rest of the nervous system but not in ciliated neurons (Senti

390 and Swoboda, 2008). Accordingly, a fosmid based Ct-tagged DAF-19 reporter

391 that labels all isoforms is broadly expressed in neurons (**Figure S7**). We did not

392 find any obvious DAF-19::GFP expression defects in *fkh-8(vlc43)* mutants

393 (**Figure S7**). Co-localization of DAF-19::GFP with *dat-1::mcherry* dopaminergic

394 reporter expression or DiD lipophilic staining also reveals similar expression in

395 *wild type* and *fkh-8(vlc43)* mutants in the dopaminergic or amphid ciliated

396 neurons (**Figure S7**). Thus, our data suggest that, despite its extensive binding

397 to *daf-19* locus, FKH-8 does not seem to be required for *daf-19* expression, at

398 least in the subpopulation of ciliated neurons directly assayed.



399 Next, we assessed FKH-8::GFP fosmid expression in *daf-19(m86); daf-*  
400 *12(sa204)* double null mutants. In contrast to the pan-ciliated neuron expression  
401 pattern seen in *wild type*, FKH-8::GFP is expressed pan-neuronally in *daf-*  
402 *19(m86); daf-12(sa204)* double mutants (**Figure 6B**). FKH-8::GFP expression in  
403 the PDE dopaminergic ciliated sensory neuron is unaffected in *daf-19(m86);*  
404 *daf-12(sa204)* double mutants as assessed by co-localization with *dat-1:cherry*  
405 (91% PDE neurons are FKH-8::GFP positive in *wild type* animals and 92% in  
406 *daf-19(m86)* mutants, suggesting that FKH-8::GFP expression is unaffected in  
407 ciliated neurons (**Supplementary File 1**). *daf-19(m86)* allele affects all  
408 isoforms; as DAF-19 isoform D is expressed in ciliated neurons, our results  
409 suggest DAF-19D is not necessary for FKH-8 expression in ciliated neurons. In  
410 contrast, DAF-19 isoforms A and B seem to repress FKH-8 expression in non-  
411 ciliated neurons. *daf-19(of5)*, a mutant allele that specifically affects *daf-19 a/b*  
412 isoform expression (**Figure 6A**) shows similar pan-neuronal de-repression of  
413 FKH-8::GFP (**Figure 6B**) further supporting the repressive role of DAF-19 A/B  
414 long isoforms.

415 Next, we aimed to assess if DAF-19 and FKH-8 act synergistically. *daf-19* and  
416 *fkh-8* genes are both located in chromosome II, despite several attempts, we  
417 failed to generate *daf-19(m86), fkh-8(vlc43) II; daf-12(sa204)* triple mutants but  
418 we were able to obtain *daf-19(m86), fkh-8(tm292); daf-12(sa204)* recombinant  
419 animals. We find DAF-19 and FKH-8 act synergistically in the regulation of *ift-*  
420 *20, peli-1, osm-1* and *xbx-1* reporters (**Figure 6C, D**). Of note, these reporters  
421 still show some vestigial expression in the triple mutant (**Figure 6D**). We  
422 CRISPR-engineered a full deletion of the *fkh-8* locus in the *daf-19(m86); daf-*  
423 *12(sa204); ift-20::rfp* strain which generated a viable triple null mutant [*fkh-8*

424 (*vlc39*) allele]. These animals show similar residual *ift-20* expression in a couple  
 425 of unidentified neurons (**Figure 6C**), suggesting additional transcription factors  
 426 might cooperate with DAF-19 and FKH-8 in the regulation of ciliome gene  
 427 expression.  
 428

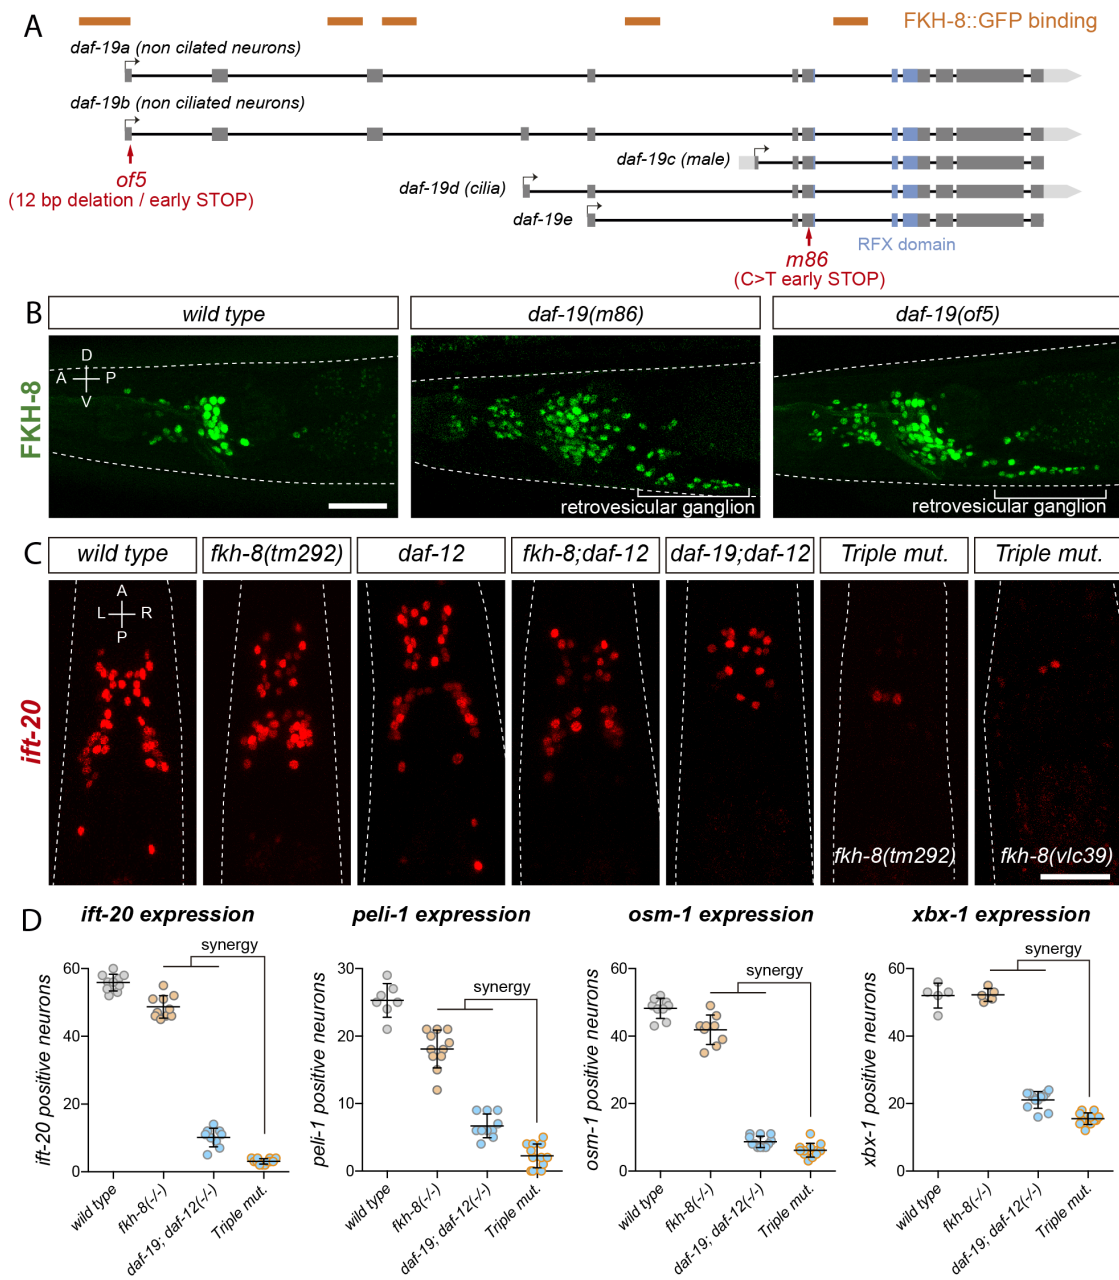

Figure 6

**Figure 6. FKH-8 and DAF-19 exhibit crosstalk and synergistic effects in the transcriptional regulation of the ciliome.**

A) *daf-19* locus codes for five different *daf-19* isoforms. Grey boxes represent exons whereas blue boxes correspond to exons coding for the RFX DNA binding domain. FKH-8 binding events are depicted as orange bars. Red arrows locate mutations of the corresponding alleles.

B) Lateral views from young adult hermaphrodite heads expressing the *fkx-8* fosmid-based reporter *wgIs652*. Lack of all *daf-19* isoforms (*m86* allele) derepresses *fkx-8* in non-ciliated neurons. This phenotype is mimicked by the specific absence of long *daf-19a/b* isoforms (*of5* allele). Scale bar = 25  $\mu$ m.

C) Dorso-ventral images from young adult hermaphrodites showing core ciliome *ift-20* reporter expression in several genetic backgrounds. Scale bar = 25  $\mu$ m.

D) Mean number of reporter-expressing neurons is significantly lower than expected in *fkx-8(tm292)*, *daf-19(m86)*, *daf-12(sa204)* triple mutants for the core ciliome features *ift-20*, *peh-1*, *osm-1* and *xbx-1*. Each dot represents the number of reporter-expressing neurons scored in a single animal. Mean and standard deviation are represented. See **Supplementary File 1** for raw data and statistics for all analysed genetic backgrounds.

429

430 **Mouse FOXJ1 and FOXN4, master regulators of motile ciliome, can**  
431 **functionally replace FKH-8**

432 Vertebrate FKH family is composed by 49 different members divided into 16  
433 subfamilies (Shimeld et al., 2010). The establishment of specific orthology  
434 relationships between FKH members is challenging among distant species  
435 (Shimeld et al., 2010), precluding the direct assignment of the closest  
436 vertebrate ortholog for *C. elegans* FKH-8.

437 To date, no vertebrate FKH TF has been involved in ciliogenesis in primary cilia  
438 cell types. Nevertheless, in several vertebrate cell types that contain motile cilia,  
439 FoxJ1 FKH TF directly activates ciliome gene expression (Brody et al., 2000;  
440 Chen et al., 1998; Stubbs et al., 2008; Yu et al., 2008). Thus, considering its  
441 role in ciliogenesis, we next wondered if mouse FOXJ1 could functionally  
442 substitute FKH-8 in *C. elegans*. We find this to be the case as FoxJ1 cDNA  
443 expression under the dopaminergic promoter *dat-1* rescues *ift-20* expression  
444 similarly to *fkx-8* cDNA (**Figure 7A-C**). In *Xenopus*, another FKH TF, FoxN4,  
445 binds similar genomic regions to FoxJ1 and it is also required for direct ciliome  
446 gene expression in motile multiciliated cells (Campbell et al., 2016). We find

447 FoxN4 expression also rescues *ift-20* expression defects in *fkh-8(vlc43)*  
448 animals. Importantly, we find that conserved functionality is not observed for  
449 any vertebrate FKH TFs as expression of mouse Foxl1, a FKH TF involved in  
450 the development of several tissues but not reported to control cilia gene  
451 expression (Edlund et al., 2015), does not rescue *fkh-8* mutant phenotype.  
452 In summary, our results unravel the functional conservation between FKH-8 and  
453 specific mouse members of the FKH family, which have already been described  
454 to work together with RFX TFs in the regulation of ciliome gene expression in  
455 motile cilia cell types.

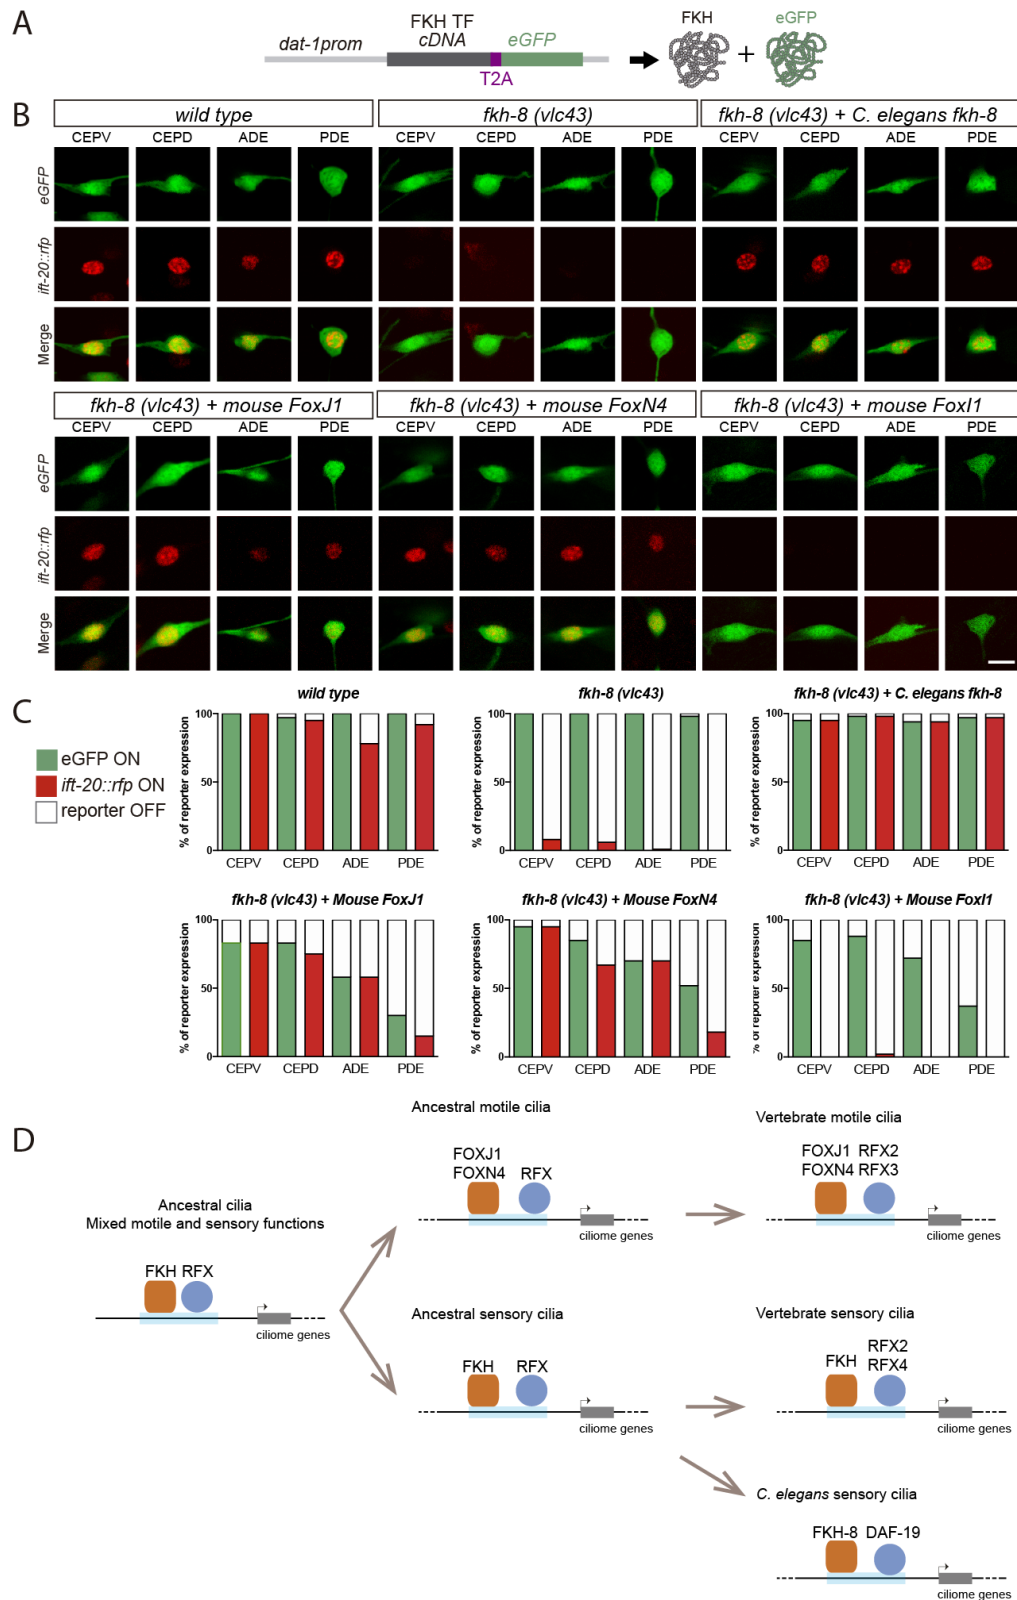

Figure 7

**Figure 7. Mammalian FKH TFs with known motile cilia regulatory functions can rescue *fkh-8* mutant phenotype.**

A) Rescue strategy: *dat-1* promoter, unaffected in *fkh-8* mutants, is used to drive FKH TF cDNA and eGFP expression specifically in the dopaminergic ciliated system.

B) Representative images of dopaminergic neurons expressing an integrated reporter for the core ciliome marker *ift-20* (in red) in *wild type*, *fkh-8(vlc43)* mutants and with the co-expression of different rescuing constructs. Scale bar = 5  $\mu$ m.

C) Quantification of rescue experiments. *ift-20* reporter expression is lost from the dopaminergic neurons in *fkh-8(vlc43)* null mutants compared to *wild type* animals. Expression of FKH-8, FOXJ1 and FOXN4 but not FOXI1 is sufficient to recover *ift-20* expression in dopaminergic neurons. N = 30 animals per transgenic line. See **Supplementary file 1** for similar results obtained with two additional transgenic lines per construct.

D) Speculative model on the evolution of ciliome gene regulatory logic. FKH and RFX TFs could have an ancestral role in the direct coregulation of ciliome genes before its functional diversification into motile and primary cilia cell types. Different RFX and FKH TF members could have evolved to regulate ciliome genes in specific cell types in different organisms. Orange squares represent FKH TFs and blue circles RFX TFs, light blue bars represent ciliome enhancers.

457

458

459 **DISCUSSION**

460 **FKH-8 works together with DAF-19 in the direct regulation of ciliome gene**  
461 **expression in sensory neurons**

462 RFX are the only TFs known to be involved in the direct regulation of ciliome  
463 gene expression both in cell types with motile and sensory cilia. This role is  
464 conserved in nematodes, flies and vertebrates (Choksi et al., 2014). In this work  
465 we characterized the persistent activity of ciliome reporters in *daf-19/rfx* null  
466 mutants, demonstrating that, in some specific cellular contexts, DAF-19/RFX is  
467 not necessary to drive ciliome gene expression. DAF-19 is the only RFX TF in  
468 *C. elegans*; thus, persistent enhancer activity must be attributed to other TF  
469 families.

470 A multi-angled approach allowed us to identify FKH-8 as a key regulator of  
471 ciliome gene expression in most, if not all, sensory neurons in *C. elegans*. FKH-  
472 8 is expressed almost exclusively in all ciliated neurons and binds to upstream  
473 regions of many ciliome genes. *fkh-8* mutants show decreased levels of ciliome  
474 reporter gene expression, abnormal cilia morphology and defects in a plethora  
475 of behaviours mediated by sensory ciliated neurons. Finally, mutations in  
476 putative FKH binding sites for two ciliome reporters lead to expression defects,  
477 further supporting the direct action of FKH-8 in ciliome gene expression.  
478 Altogether, our results show that FKH-8 is a master regulator of ciliogenesis in  
479 sensory neurons and thus represents the first identified TF in any organism that  
480 works together with RFX in cell types with non-motile primary cilia.

481 In the past, the identification of direct targets of RFX TFs has been instrumental  
482 in the identification of new ciliome components, which lead to a better  
483 understanding of cilia function and the etiology of ciliopathies (Blacque et al.,

484 2005; Chen et al., 2006; Efimenko et al., 2005; Li et al., 2004; Schiebinger et  
485 al., 2019). FKH-8 binds to many genes in the *C. elegans* genome, some with  
486 uncharacterized functions; thus, similar to RFX, a more exhaustive  
487 characterization of FKH-8 targets could be used to unravel novel components of  
488 the sensory ciliome.

489

#### 490 **Specific DAF-19 isoforms repress *fkh-8* expression in non-ciliated** 491 **neurons**

492 Interestingly, our results show that DAF-19A and B isoforms repress (directly or  
493 indirectly) *fkh-8* expression in non-sensory neurons. Repression of alternative  
494 fates is a prevalent feature in neuronal development. DAF-19AB repression of  
495 *fkh-8* might be necessary to avoid ectopic ciliome gene expression in non-  
496 ciliated cells. Indeed, we find that, similar to *fkh-8*, *kap-1* gene, a core ciliome  
497 component involved in anterograde transport and cilia assembly is also pan-  
498 neuronally de-repressed in *daf-19* mutants (R.B. and N.F. unpublished).  
499 Repressive actions for DAF-19A/B have also been recently reported (Stasio et  
500 al., 2018).

501

#### 502 **Role of FKH TFs in the transcriptional regulation of ciliome genes both in** 503 **motile and sensory cilia cell types**

504 Although TFs working with RFX in the regulation of ciliogenesis in sensory cell  
505 types where previously unknown, RFX TFs work in concert with the FKH TF  
506 FOXJ1 in the direct regulation of ciliome genes in different vertebrate cell types  
507 with motile cilia (Choksi et al., 2014).



508 Importantly, vertebrate sensory ciliogenesis is unaffected in FoxJ1 loss of  
509 function mutants (Choksi et al., 2014); thus, FoxJ1 role as a master regulator of  
510 ciliogenesis is restricted to motile ciliary cell types. In *Xenopus*, FoxN4 binds  
511 similar genomic regions to FoxJ1 and it is also required for motile ciliome gene  
512 expression (Campbell et al., 2016). We find both FOXJ1 and FOXN4, but not  
513 FOXI1, which has not been described to be involved in ciliogenesis, are able to  
514 functionally substitute FKH-8. This data suggests that specific FKH subfamilies  
515 might have an inherent capacity to act as direct ciliome regulators,  
516 independently of being expressed in motile or sensory cilia cell types.

517

#### 518 **FKH-8 and DAF-19 show synergistic actions**

519 FKH-8 bound regions are enriched for X-box/RFX sites, suggesting DAF-19 and  
520 FKH-8 are involved in the regulation of a common set of regulatory regions. Our  
521 double mutant analysis shows synergistic effects between *daf-19/rfx* and *fkh-8*,  
522 suggesting cooperative actions among these TFs.

523 Similarly, in motile multiciliated cells of *Xenopus* larval skin FOXJ1 binding to  
524 ciliome gene promoters depends on the presence of RFX2 (Quigley and  
525 Kintner, 2017). In addition, in human airway multiciliated epithelial cell, RFX3  
526 and FOXJ1 act synergistically in the activation of ciliome genes (Didon et al.,  
527 2013).

528 Importantly, in *fkh-8*, *daf-19* double mutants, some enhancer activity is still  
529 present in several sensory cells underscoring the existence of additional direct  
530 regulators of ciliome gene expression. Nuclear hormone receptor *nhr-277* and  
531 *nhr-158* and the homeodomain *ceh-57*, whose expression is enriched in

532 sensory neurons (**Figure 1F**), are possible candidates to be involved in the  
533 process and could be the focus of future studies.

534

### 535 **Evolution of cilia subtype specialization and ciliome regulatory logic**

536 Ancestral cilium present in the last common eukaryotic ancestor has been  
537 proposed to combine motile and sensory functions (Mitchell, 2017). RFX role  
538 regulating ciliome expression predates the emergence of metazoans, where  
539 major cell type diversification has occurred (Chu et al., 2010; Piasecki et al.,  
540 2010). FoxJ and FoxN constitute the most ancient FKH sub-families, present in  
541 choanoflagellate *Monosiga brevicolis*, while FoxI subfamily is only present in  
542 bilaterians (Shimeld et al., 2010). Moreover, the ability of RFX and FKH TFs to  
543 bind similar genomic regions is not limited to metazoans and it is also present in  
544 fungi. In *Schizosaccharomyces pombe*, which lacks cilia and ciliome genes,  
545 Fkh2 FKH TF and Sak1 RFX TF bind the same regulatory regions to control cell  
546 cycle gene expression (Garg et al., 2015), suggesting that the joint actions for  
547 these TFs could be present before the split of fungi and metazoans.  
548 Alternatively, RFX and FKH TFs might have an inherent ability to cooperate that  
549 could explain convergent evolution of these TFs in ciliome regulation both in  
550 sensory and motile cilia cell types (Sorrells et al., 2018).

551 In light of these data, we hypothesize that RFX and FKH role as co-regulators  
552 of ciliome gene expression could precede the emergence of cilia division of  
553 labor and the specialization of motile and sensory cilium in different cell types  
554 (**Figure 7D**).

555

### 556 **Role of FKH TFs in ciliome regulation of primary cilia cell types**

557 Regardless of the evolutionary history of events underlying RFX and FKH  
558 functions as master regulators of ciliome gene expression, our results raise the  
559 possibility that, in vertebrates, yet unidentified FKH TFs could work together  
560 with RFX as master regulators of ciliome gene expression in sensory ciliated  
561 cell types (**Figure 7D**). The establishment of specific orthology relationships  
562 between FKH members among distant species is challenging (Larroux et al.,  
563 2008; Shimeld et al., 2010) precluding the direct assignment of the closest  
564 vertebrate ortholog for *C. elegans* FKH-8. In addition, functional paralog  
565 substitutions among TFs of the same family have been described to occur in  
566 evolution (Tarashansky et al., 2021). Importantly, FoxJ1 and FoxN4 mutants do  
567 not show ciliome gene expression defects in non-motile ciliated cell types  
568 (Brody et al., 2000; Campbell et al., 2016; Chen et al., 1998; Stubbs et al.,  
569 2008; Yu et al., 2008). Other members of FoxJ and FoxN subfamilies are  
570 broadly expressed in mouse neurons, which all display primary cilia (Zeisel et  
571 al., 2018). It will be important, in future studies, to determine if additional FoxJ  
572 and FoxN TFs can rescue *fkh-8* expression defects in *C. elegans* and if they  
573 display similar roles in mammals as master regulators of sensory ciliome. These  
574 studies could also help better characterize the functional meaning of non-coding  
575 mutations associated to orphan ciliopathies.

576  
577  
578

## 579 **METHODS**

### 580 ***C. elegans* strains and genetics**

581 *C. elegans* culture and genetics were performed as previously described  
582 (Brenner, 1974). Strains used in this study are listed in **Supplementary File 4**.

### 583 **Mutant strain genotyping**

584 Mutant strains used in this study are listed in **Supplementary File 4**. Deletion  
585 alleles were genotyped by PCR. Presence of *daf-19(m86)* allele was  
586 determined by visual inspection of the dye-filling defective phenotype of  
587 homozygous mutants. Presence of *daf-12(sa204)X* allele was ensured through  
588 a double cross strategy, crossing of F1 males with original *daf-12(sa204)X*  
589 mutants. Strains carrying point mutations were genotyped by sequencing.  
590 Genotyping primers are included in **Supplementary File 4**.

### 591 **DiD staining.**

592 Lipophilic dye filling assays were performed with the 1,1'-dioctadecyl-3,3,3',3  
593 '-tetramethylindodicarbocyanine, 4-chlorobenzenesulfonate salt (DiD)  
594 (ThermoFisher, #D7757). DiD staining solution was freshly prepared prior to  
595 every assay as a 1:200 dilution of the DiD stock solution [2 mg/mL dilution in  
596 N,N-dimethyl formamide (Sigma, #D4551)] in M9 1X buffer. Animals were  
597 transferred into 1.5 mL tubes containing 200  $\mu$ L of the DiD staining solution and  
598 incubated (wrapped in aluminium foil) for 2 hours at room temperature in an  
599 orbital shaker in a horizontal position. Animals were collected with a glass  
600 Pasteur and transferred to fresh NGM plates. Robust identification of the ASK,  
601 ADL, ASI, AWB, ASH, ASJ, PHA and PHB ciliated neurons was achieved  
602 through this method.

### 603 **Generation of *C. elegans* transgenic lines**

604 Fluorescent reporters for ciliome genes were generated through fusion PCR  
605 (Hobert, 2002). To facilitate identification and scoring of reporter-expressing  
606 cells, GFP was tagged to the cell's nucleus employing a modified sequence of  
607 the classical SV40 large T antigen nuclear localizing signal (NLS) (Kalderon et  
608 al., 1984). Regulatory sequences were amplified with custom oligonucleotides  
609 from N2 genomic DNA preparations. An independent PCR was used to amplify  
610 the 2xNLS::GFP::*unc-54* 3'UTR fragment from an NLS version of the pPD95.75  
611 plasmid (pNF400). Successfully fused PCR products were purified using the  
612 QIAquick PCR Purification Kit (QIAGEN, #28106) and resuspended in  
613 nuclease-free water (Sigma, #W4502).

614 Mutated versions for the *xbx-1* and *ift-20* promoters were generated as PCR  
615 products by introducing the desired mutation of putative FKH sites within the  
616 corresponding custom primers. Putative FKH sites were identified through the  
617 single sequence scan tool from the CIS-BP website (Weirauch et al., 2014).  
618 Mutation criteria accounted for the nature of the nitrogenous bases and the  
619 number of hydrogen bonds they could form; thus, A was mutated to C and G  
620 was mutated to T (and vice versa). Mutated sequences were checked to discard  
621 the generation of new TF binding site motifs using both the motif scan tool of  
622 the CIS-BP database and the Tomtom tool (Gupta et al., 2007) from the MEME  
623 Suite website. When designed mutations created potential new TF binding sites  
624 manual punctual mutations were applied to disrupt those potential sites.

625 To generate FKH-8 rescuing plasmids, constructs containing the cDNA of the  
626 corresponding FKH TF fused to the self-cleaving peptide T2A (Ahier and  
627 Jarriault, 2014) and the eGFP cDNA from the pPD95.75 plasmid were created.  
628 Such constructs were then cloned under the control of the dopaminergic *dat-1*

629 promoter between the KpnI/XhoI sites of the pPD95.75 backbone vector. *fkh-8*  
630 cDNA sequence was synthetically generated (Biomatik). Murine FKH members  
631 were obtained as Dharmacon clones (FoxJ1: MMM1013-202732974, FoxN4:  
632 MMM1013-211694291, FoxI1: MMM1013-202763055).  
633 Simple-array transgenic lines were generated by intragonadal microinjection  
634 into strains of the appropriated genotype. The injection mix was composed by  
635 50 ng/μL of a given purified fusion PCR or a rescuing plasmid plus 100 ng/μL of  
636 the pFR4 plasmid, *rol-6(su1006)*, as a co-marker (Mello et al., 1991).

### 637 **Generation of *C. elegans* mutations**

638 Whole deletion of the *fkh-8* locus was performed through a co-CRISPR strategy  
639 (Kim et al., 2014) using *dpy-10(cn64)* as conversion marker (Arribere et al.,  
640 2014). Custom CRISPR RNAs (crRNAs) were ordered (IDT, Alt-R® CRISPR-  
641 Cas9 crRNA XT) targeting both sides of the desired deletion of *fkh-8* and at the  
642 5' of the *dpy-10* site of mutation. Single stranded oligodeoxynucleotide  
643 (ssODNs) of approximately 100 base pairs overlapping each side of the genetic  
644 modifications were also ordered (IDT) and used as donor templates to achieve  
645 homology-directed repair. Cas9 nuclease (IDT, #1081058) and the universal  
646 trans-activating crRNA (tracrRNA) needed to initiate enzymatic activity (IDT,  
647 #1072532) were used. co-CRISPR injections were performed on young adult  
648 hermaphrodites expressing the reporter *otIs395(ift-20::NLS::tagRFP)III*.  
649 Microinjection mix was freshly prepared with all 3 crRNAs plus the tracrRNA,  
650 ssODNs and Cas9 nuclease. Ribonucleoprotein complex formation was  
651 achieved by incubating this mix for 10 minutes at 37 Celsius degrees. Before  
652 use, the final mix was incubated on ice for 30 minutes. All custom primer

653 sequences and concentrations used for the generation of the aforementioned  
654 strains are included in the **Supplementary File 4**.

### 655 **Bioinformatical Analysis**

656 Ciliome gene list was assembled including genes associated with cilium-related  
657 terms from the Gene Ontology using AmiGO (Carbon et al., 2009), known  
658 ciliome genes with functional X-boxes (Burghoorn et al. 2012) and genes whose  
659 expression in ciliated neurons was reported in the WormBase. Transcription  
660 factors were deliberately excluded from this list. A further curation process was  
661 performed through a bibliographic research (see **Supplementary File 2** for  
662 complete ciliome gene list).

663 For each isoform of the final 163 genes composing the ciliome gene list,  
664 putative regulatory sequences were retrieved from the Ensembl BioMart site  
665 (Kinsella et al., 2011) spanning 700 base pairs in length upstream of their  
666 translational start sites. These sequences were used to feed the RSAT oligo-  
667 analysis tool as previously described (Defrance et al., 2008; Turatsinze et al.,  
668 2008), using as a background model the in-tool genome of *C. elegans* and  
669 overall default options. Retrieved matrices were then compared both against  
670 the CIS-BP 1.02 (Weirauch et al., 2014) and the JASPAR core non-redundant  
671 2018 (Khan et al., 2018) databases using the TomTom (Gupta et al., 2007) tool  
672 from the MEME suite (Bailey et al., 2009).

673 Identification of candidate transcription factors with enriched expression in  
674 ciliated neurons was performed through the on-line tool GExplore<sub>1.4</sub> (Hutter and  
675 Suh, 2016), employing the sci-RNA-seq dataset by (Cao et al., 2017). A 5-fold  
676 enrichment ratio and a false detection rate of 0.001 were used.

677 Expression pattern data in each ciliated neuron type for candidate transcription  
678 factors at the fourth larval stage were retrieved from the *C. elegans* Neuronal  
679 Gene Expression Network (CeNGEN) (Taylor et al., 2021), whose results are  
680 freely accessible through the on-line tool SCeNGEA. Unfiltered data was used.  
681 ChIP-seq data from *C. elegans* TFs were retrieved from the ENCODE portal  
682 website (Davis et al., 2018) (time of consulting: January the 10th, 2019). Data  
683 analysis was performed through a custom script using R/Bioconductor (Huber et  
684 al., 2015). Peak annotation was carried out employing the ChIPseeker package  
685 (Yu et al., 2015), setting parameters as following: `annotatePeak(gr1,`  
686 `tssRegion=c(-2000, 1000), level=lev, TxDb=annoData, overlap="TSS")`.  
687 ENCODE accession numbers for all datasets used in this analysis are listed in  
688 **Supplementary File 2**.  
689 *fkh-8* ChIP-seq bed narrowPeak file (ENCODE accession: ENCFF653QKE)  
690 was used as input file for the web-based analysis tool ChIPseek (Chen et al.,  
691 2014). For de novo motif discovery, resulting fasta file with annotated peaks  
692 was then used to feed the RSAT peak-motifs tool as previously described  
693 (Thomas-Chollier et al., 2012b, 2012a), setting the number of motifs per  
694 algorithm at 10 and using all 4 available discovery algorithms with overall  
695 default options.  
696 For gene ontology, genes associated to FKH-8 ChIP-seq peaks were  
697 analysed through the on-line tool WormEnricher (Kuleshov et al., 2016).  
698 Gene expression correlation between TFs and genes of interest were  
699 calculated using embryonic sc-RNA-seq data (Packer et al., 2019). Genes of  
700 interest were categorized into four categories: 1) core ciliome genes, 2)  
701 subtype-specific ciliome genes (both extracted from our ciliome list), 3)



702 panneuronal genes (Stefanakis et al., 2015) and 4) ubiquitously expressed  
703 genes (Packer et al., 2019). In addition to fkh-8 and daf-19, the proneural TF  
704 factor hlh-14 was added as control TF not related to ciliogenesis. For all 10,775  
705 ciliated cells present in the dataset, correlation index (R) between the  
706 expression levels for each gene and the TF was calculated. R data for each  
707 gene category are represented in the graph (See **Supplementary File 2** for R  
708 values).

709 Presence of RFX/*daf-19* binding motifs within the FKH-8 ChIP-seq peak  
710 sequences was performed with the on-line tool Centrimo (Bailey and  
711 MacHanick, 2012) from the MEME suite. To prevent Centrimo from discarding  
712 sequences due to uneven sequence length within and among the different  
713 ChIP-seq datasets, a custom python script was used to extract sequences of  
714 420 base pairs in length spanning 210 base pairs from the centre of each peak.  
715 This consensus length was used considering the average sequence length of  
716 FKH-8 ChIP-seq peaks. ENCODE accession numbers for all datasets used in  
717 this analysis are listed in **Supplementary File 2**.

718 Visualization and analysis of ChIP-seq and RNA-seq files were performed with  
719 the Integrative Genomics Viewer (IGV) software (Robinson et al., 2011).

## 720 **Microscopy**

721 For scoring and image acquisition, worms were anesthetized with a drop of 0.5  
722 M sodium azide (Sigma, #26628-22-8) on 4% agarose pads (diluted in distilled  
723 water) placed over a regular microscope glass slide (Rogo Sampaic,  
724 #11854782). These preparations were sealed with a 24 x 60 mm coverslip (RS  
725 France, #BPD025) and animals were then conveniently examined.

726 Scoring of ciliome features was performed observing the animals on a Zeiss  
727 Axioplan 2 microscope using a 63X objective. Assessment of fluorescence  
728 signal on PDE and Phasmid regions was performed *de visu*. To appropriately  
729 assess number of cells in the head, optical sections containing the volume of  
730 reporter-positive neurons in the head of the animals were acquired at 1  $\mu\text{m}$   
731 intervals and images were manually scored using FIJI (Schindelin et al., 2012).  
732 Reporters used in the FKH cis-mutational analyses (both *wild type* and mutated  
733 forms) were scored *de visu* as the low intensity and fast bleaching in their  
734 signals precluded us from taking pictures.

735 For cilia morphology assessment, image acquisition was performed with a TCS-  
736 SP8 Leica Microsystems confocal microscope using a 63X objective. The  
737 following conditions of optical sections ( $\mu\text{m}$ ) were used: CEP: 0.4  $\mu\text{m}$ ; ADF: 0.2;  
738 AWB: 0.24; AWC: 0.3. Retrieved images were z-projected at maximum intensity  
739 (Leica LAS X LS) and linear adjustment for brightness and contrast was  
740 performed prior to cilia length quantification ( $N \geq 32$  cilia per neuron type) (FIJI).  
741 AWA analysis was performed from images acquired from dorsoventrally  
742 positioned animals ( $N = 7$ ) in which both cilia were levelled and depth of  
743 arborisation was estimated from the volume containing all the optical sections  
744 (0.3  $\mu\text{m}$ ) in which fluorescence signal was observed.

745 All micrographs presented in this paper were acquired with a TCS-SP8 Leica  
746 Microsystems confocal microscope using a 63X objective and appropriate  
747 zooming conditions. Raw data and statistics for all scorings performed for this  
748 work are gathered in **Supplementary File 1**.

749 **Behavioural assays**

750 Unless otherwise stated, all mechano- and chemosensory assays were  
751 performed over small-scale synchronized populations of young adult  
752 hermaphrodites.

753 Nose touch tests were performed as previously described (Kaplan and Horvitz,  
754 1993). Ten minutes before the assay, young adult hermaphrodites were  
755 transferred to non-seeded NGM agar plates and nose touch responses were  
756 elicited by causing a nose-on collision placing an eyelash attached to a pipette  
757 tip in the path of an animal moving forward. With brief modifications from  
758 (Brockie et al., 2001), five consecutive nose touch trials were scored for each  
759 worm.

760 Both gentle and harsh touch mechanosensory tests were performed as  
761 previously described (Chalfie et al., 1985). Briefly, gentle touch assays were  
762 performed by alternatively stroking the animal just behind the pharynx and just  
763 before the anus with an eyebrow hair attached to a pipette tip for a total amount  
764 of 10 strokes (Hobert et al., 1999). Harsh touch assays were also performed by  
765 stroking the worms across the posterior half of their bodies in a top-down  
766 manner with a platinum wire. Each worm was tested five times with a 2 minutes  
767 interval between each trial (Li et al., 2011).

768 For all aforementioned mechanosensory assays, escape responses of trailed  
769 animals were recorded and a population response index (RI) was calculated for  
770 every replica as:  $RI = \text{total number of escape responses} / \text{total amount of}$   
771 strokes

772 Chemotaxis towards diacetyl, 2-heptanone, NaCl and 2-nonanone were  
773 performed over 3 times freshly washed worms with 1 mL of filtered, autoclaved  
774 CTX solution, aspirating the supernatant to a final volume of approximately 100

775  $\mu\text{L}$ . 2  $\mu\text{L}$  of this worm-containing solution with no less than 25 animals were  
776 placed at the proper place of the assay plates. During the assays, worms were  
777 allowed to freely crawl across the plates for 60 minutes at room temperature  
778 and then stored at 4 °C until the next day when worms' positions were scored  
779 and behavioural indexes were calculated.

780 With few modifications, volatile diacetyl attraction assay was performed as  
781 described by (Margie et al., 2013). A four-quadrant paradigm drawn at the base  
782 of non-seeded NGM agar plates was used, adding a 1 cm circular central area  
783 that worms had to trespass to be scored. Stock diacetyl (Sigma-Aldrich,  
784 #803528) test solution was prepared as a 0.5% V/V mix in absolute ethanol  
785 (Scharlau, #ET00101000). Absolute ethanol was used as control solution.  
786 Immediately after the worms were plated, 2  $\mu\text{L}$  of a mix combining equal  
787 volumes of diacetyl stock solution and sodium azide 1M were pipetted onto the  
788 2 test sites (T) of the agar plate. Same procedure was then performed for the 2  
789 control sites (C). Chemotaxis index (CI) was then calculated as:  $CI = (\text{worms in } (T1 + T2) - \text{worms in } (C1 + C2)) / \text{total scored worms}$   
790

791 Chemotaxis assay towards 2-heptanone was performed as previously reported  
792 (Zhang et al., 2016). A two-halves paradigm was used, adding the threshold  
793 distance by (Margie et al., 2013) to prevent immobile worms from skewing the  
794 data. 2-heptanone (Sigma Aldrich, #W254401) test solution was prepared as a  
795 1:10 V/V mix in ethanol absolute. Ethanol was used as control solution.  
796 Immediately after the worms were plated, 3  $\mu\text{L}$  of a mix combining equal  
797 volumes of 2-heptanone stock solution and sodium azide 1M were pipetted onto  
798 the test site (T) of the agar plate. Same procedure was follow to the control site  
799 (C). CI was calculated:  $CI = (\text{worms in T} - \text{worms in C}) / \text{total scored worms}$ .

800 Chemotaxis toward NaCl was also performed of a two-halves paradigm. Radial  
801 gradients of either test or control solutions were created prior to worm loading  
802 as originally stated (Ward 1973). Following (Frøkjær-Jensen et al., 2008), 10  $\mu$ L  
803 of NaCl (Sigma, #S3014-1KG) 2.5 M (dissolved in double distilled water  
804 (ddH<sub>2</sub>O)) or ddH<sub>2</sub>O itself were respectively pipetted onto the agar surface at T  
805 and C spots and allowed to diffuse for 12-14 hours at room temperature. To  
806 increase steepness of the gradients, 4  $\mu$ L of NaCl 2.5 M or ddH<sub>2</sub>O solutions  
807 were additionally added to the T and C spots respectively 4 hours prior to the  
808 chemotaxis assay. Chemotaxis indexes for two-halves paradigm assays were  
809 calculated as:  $CI = (\text{worms in T} - \text{worms in C}) / \text{total scored worms}$ .

810 Avoidance assay towards 2-nonanone was performed as previously reported  
811 (Troemel et al., 1997). Briefly, six equal sectors labelled as A, B, C, D, E and F  
812 were drawn on the base of squared plates (90 x 15 mm, Simport™, #  
813 11690950) containing 15 mL of standard NGM agar. Stock 2-nonanone (Sigma-  
814 Aldrich, #W278550) test solution was prepared as a 1:10 V/V mix in absolute  
815 ethanol. Ethanol was used as control solution. Immediately after the worms  
816 were plated on the centre of the plate, 2  $\mu$ L of a mix combining equal volumes  
817 of 2-nonanone stock solution and sodium azide 1M were pipetted onto two  
818 spots within peripheral test sector A. Same procedure was then performed for  
819 the ethanol control sites within sector opposite peripheral control sector F.  
820 Population avoidance index (AI) was calculated as:  $AI = (\text{worms in (A+B)} -$   
821  $\text{worms in (E + F)}) / \text{total amount of worms}$ .

822 Avoidance responses to water-soluble compounds were evaluated using the  
823 drop test as previously described (Hilliard et al., 2002). Following (Hilliard et al.,  
824 2004) with few modifications, well-fed synchronized young adult

825 hermaphrodites were washed three times with M13 buffer. 5 animals were then  
826 placed on unseeded NGM agar plates and allowed to rest for 10 minutes. Two  
827 test solutions were assayed: 0.1% W/V sodium dodecyl sulfate (SDS) (Sigma,  
828 #L3771-100G) and 0.1 mM CuSO<sub>4</sub> pentahydrate (Merck, #1027901000), both  
829 dissolved in the M13 buffer that acted as control solution. Each animal was  
830 tested first with 4 single drops of the control solution and then with 4 single  
831 drops of the testing solution, allowing for 2 minutes of recovery between each  
832 stimulus. Avoidance response was scored within 4 seconds after substance  
833 delivery. Population avoidance index (AI) per genotype and replica was  
834 calculated as: AI = number of responses / total amount of drops.

835 Dauer induction was performed using filtered liquid culture obtained from *wild*  
836 *type* worms grown at 7 worms/μl for 4 days. Briefly, 300μl of pheromone  
837 containing extracts or control extracts (culture media alone) were added to  
838 60mm OP50-seeded NGM plates. After drying, 10 gravid worms were added  
839 and allowed to lay eggs for 18 hours and then removed from the plates. 72h  
840 later, resulting P0 worms were scored and percentage of dauer animals  
841 determined for each condition. Dauer induction was carried at 27°C in four  
842 independent experiments performed in parallel with wild type and *fkh-8(vlc43)*  
843 mutant worms.

844 Basal slowing response was performed with few modifications as previously  
845 reported (Sawin et al., 2000). In this case, 60 mm NGM plates in which HB101  
846 was seeded in only one half of the plate were used. Briefly, well-feed worms  
847 were 3 times washed with 1 mL of filtered, autoclaved CTX solution,  
848 supernatant aspirated to a final volume of approximately 200 μL and 2 μL of this  
849 worm-containing solution (with no less than 10 animals) was placed at the non-

850 seed part of pre-warmed assay plates. Free movement of the worms across the  
851 plates was recorded capturing 30 frames per second. Body beds per 20  
852 seconds intervals were counted from same worms moving on agar and crawling  
853 across the bacterial lawn.

854 Sample size, tested genotypes, number of animals and number of replicates  
855 performed per assay are detailed in **Supplementary File 3**. All strains used for  
856 these behavioural studies are listed in **Supplementary File 4**.

### 857 **Statistical analyses.**

858 Statistical significance for the mean number of reporter-positive neurons in  
859 whole animals among different genetic backgrounds was assessed by the  
860 appropriate two-tailed t-test considering the homo- or heteroscedasticity of the  
861 samples being compared. Inbuilt Excel functions F.TEST and T.TEST were  
862 used and obtained p-values were adjusted through Bonferroni correction  
863 accounting for all possible pairwise comparisons in each experiment.

864 To increase for statistical power, statistical significance for the mean number of  
865 reporter-positive neurons in the five distinct anatomical regions containing  
866 ciliated neurons among different genetic backgrounds was assessed by the  
867 appropriate one-tailed t-test considering the homo- or heteroscedasticity of the  
868 compared samples. Obtained p-values were then adjusted through the  
869 Benjamini-Hochberg procedure setting  $\alpha$  level at 0.05. This same procedure  
870 was used to assess for statistical significance within the dauer induction  
871 experiments.

872 Unless otherwise stated, same two-tailed t-test procedure was followed in the  
873 assessment of statistical significance in behavioural experiment. Behavioural  
874 responses were ultimately analysed through the corresponding indexes ranging

875 from 0 to 1 (or to -1 to 0 when avoidance responses were assayed). For each  
876 type of assay, a population-based mean index was calculated per replica and a  
877 final response index was then obtained as the mean of all replicas' means. Prior  
878 to hypothesis testing, the Shapiro-Wilk test (Shapiro and Martin, 1965) was  
879 used to address for the normality of these final indexes.

880 Assessment of synergistic effects between *fkh-8* and *daf-19* was performed  
881 under the multiplicative model (Wagner, 2015). Briefly, average number of  
882 reporter-expressing neurons found in the whole animals for each genetic  
883 background was transformed into the corresponding fold change related to the  
884 observed mean value in the *wild type*. Next, expected values for the fold  
885 change corresponding to triple *fkh-8*; *daf-12*; *daf-19* mutants were calculated as  
886 the product of the mean observed values for the double *daf-12*; *daf-19* and the  
887 single *fkh-8* mutant strains. Statistical significance between observed and  
888 expected values was then assessed through a one-sample t test.

889 For the assessment of statistical significance in rescue experiments, data was  
890 categorically classified as 'on' or 'off' and the significance of the association was  
891 examined using the two-tailed Fisher's exact test. No further multiple testing  
892 correction was performed, as *fkh-8* null mutants were exclusively compared to  
893 wild type worms whereas each rescued line was exclusively compared against  
894 the *fkh-8* null mutants.

895

## 896 **ACKNOWLEDGMENTS**

897 We thank CGC (P40 OD010440) for providing strains. Dr Laura Chirivella,



898 Noemi Daroqui and Elia García for technical help. Erick Sousa for providing  
899 bioinformatical assistance. Ines Carrera and Elisa Martí for comments on the  
900 manuscript. Peter Swovoda for sharing *daf-19(of5)* allele.

901 Funding: This work was supported by European Research Council (StG2011-  
902 281920 and COG-101002203), Ministerio de Ciencia e Innovación (SAF2017-  
903 84790-R and PID2020-115635RB-I00) and Generalitat Valenciana  
904 (PROMETEO/2018/055).

905

## 906 **AUTHOR CONTRIBUTIONS**

907 R.B and N.F designed experiments, wrote the manuscript, and made figures  
908 with contributions from other authors. R.B conducted most of the experiments.

909 A.E performed most behavioural assays, C.M and J.T helped in the  
910 bioinformatics analysis and C.M built *fkh-8* CRISPR alleles.

911

## 912 **DECLARATION OF INTERESTS**

913 The authors declare no competing interests.

914

## 915 **REFERENCES**

916 Ahier, A., and Jarriault, S. (2014). Simultaneous expression of multiple proteins  
917 under a single promoter in *Caenorhabditis elegans* via a versatile 2A-based  
918 toolkit. *Genetics* 196, 605–613.

919 Andreu-Cervera, A., Catala, M., and Schneider-Maunoury, S. (2021). Cilia,  
920 ciliopathies and hedgehog-related forebrain developmental disorders.

- 921 Neurobiol. Dis. *150*, 105236.
- 922 Arribere, J.A., Bell, R.T., Fu, B.X.H., Artiles, K.L., Hartman, P.S., and Fire, A.Z.  
923 (2014). Efficient marker-free recovery of custom genetic modifications with  
924 CRISPR/Cas9 in *caenorhabditis elegans*. *Genetics* *198*, 837–846.
- 925 Ashique, A.M., Choe, Y., Karlen, M., May, S.R., Phamluong, K., Solloway, M.J.,  
926 Ericson, J., and Peterson, A.S. (2009). The Rfx4 Transcription Factor  
927 Modulates Shh Signaling by Regional Control of Ciliogenesis. *Sci. Signal.* *2*.
- 928 Bailey, T.L., and MacHanick, P. (2012). Inferring direct DNA binding from ChIP-  
929 seq. *Nucleic Acids Res.*
- 930 Bailey, T.L., Boden, M., Buske, F.A., Frith, M., Grant, C.E., Clementi, L., Ren,  
931 J., Li, W.W., and Noble, W.S. (2009). MEME Suite: Tools for motif discovery  
932 and searching. *Nucleic Acids Res.*
- 933 Bargmann, C.I. (1993). Genetic and cellular analysis of behavior in *C. elegans*.  
934 *Annu. Rev. Neurosci.* *16*, 47–71.
- 935 Bargmann, C.I., and Horvitz, H.R. (1991). Control of larval development by  
936 chemosensory neurons in *Caenorhabditis elegans*. *Science* (80-. ). *251*, 1243–  
937 1246.
- 938 Bargmann, C.I., Hartwig, E., and Horvitz, H.R. (1993). Odorant-selective  
939 genes and neurons mediate olfaction in *C. elegans*. *Cell* *74*, 515–527.
- 940 Blacque, O.E., Reardon, M.J., Li, C., McCarthy, J., Mahjoub, M.R., Ansley, S.J.,  
941 Badano, J.L., Mah, A.K., Beales, P.L., Davidson, W.S., et al. (2004). Loss of *C.*  
942 *elegans* BBS-7 and BBS-8 protein function results in cilia defects and  
943 compromised intraflagellar transport. *Genes Dev.* *18*, 1630–1642.
- 944 Blacque, O.E., Perens, E.A., Boroevich, K.A., Inglis, P.N., Li, C., Warner, A.,

- 945 Khattra, J., Holt, R.A., Ou, G., Mah, A.K., et al. (2005). Functional genomics of  
946 the cilium, a sensory organelle. *Curr. Biol.* *15*, 935–941.
- 947 Bonnafe, E., Touka, M., AitLounis, A., Baas, D., Barras, E., Ucla, C., Moreau,  
948 A., Flamant, F., Dubruille, R., Couble, P., et al. (2004). The Transcription Factor  
949 RFX3 Directs Nodal Cilium Development and Left-Right Asymmetry  
950 Specification. *Mol. Cell. Biol.* *24*, 4417–4427.
- 951 Brenner, S. (1974). The genetics of *Caenorabditis elegans*. *Genetics* *77*, 71–94.
- 952 Brockie, P.J., Mellem, J.E., Hills, T., Madsen, D.M., and Maricq, A. V. (2001).  
953 The *C. elegans* glutamate receptor subunit NMR-1 is required for slow NMDA-  
954 activated currents that regulate reversal frequency during locomotion. *Neuron*  
955 *31*, 617–630.
- 956 Brody, S.L., Yan, X.H., Wuerffel, M.K., Song, S.K., and Shapiro, S.D. (2000).  
957 Ciliogenesis and left-right axis defects in forkhead factor HFH-4-null mice. *Am.*  
958 *J. Respir. Cell Mol. Biol.* *23*, 45–51.
- 959 Burghoorn, J., Piasecki, B.P., Crona, F., Phirke, P., Jeppsson, K.E., and  
960 Swoboda, P. (2012). The in vivo dissection of direct RFX-target gene promoters  
961 in *C. elegans* reveals a novel cis-regulatory element, the C-box. *Dev. Biol.* *368*,  
962 415–426.
- 963 Campbell, E.P., Quigley, I.K., and Kintner, C. (2016). Foxn4 promotes gene  
964 expression required for the formation of multiple motile cilia. *Development* *143*,  
965 4654–4664.
- 966 Cao, J., Packer, J.S., Ramani, V., Cusanovich, D.A., Huynh, C., Daza, R., Qiu,  
967 X., Lee, C., Furlan, S.N., Steemers, F.J., et al. (2017). Comprehensive single-  
968 cell transcriptional profiling of a multicellular organism. *Science* (80-. ).

- 969 Carbon, S., Ireland, A., Mungall, C.J., Shu, S., Marshall, B., Lewis, S., Lomax,  
970 J., Mungall, C., Hitz, B., Balakrishnan, R., et al. (2009). AmiGO: Online access  
971 to ontology and annotation data. *Bioinformatics*.
- 972 Chalfie, M., and Sulston, J. (1981). Developmental genetics of the  
973 mechanosensory neurons of *Caenorhabditis elegans*. *Dev. Biol.* *82*, 358–370.
- 974 Chalfie, M., Sulston, J.E., White, J.G., Southgate, E., Thomson, J.N., and  
975 Brenner, S. (1985). The neural circuit for touch sensitivity in *Caenorhabditis*  
976 *elegans*. *J. Neurosci.* *5*, 956–964.
- 977 Chen, J., Knowles, H.J., Hebert, J.L., and Hackett, B.P. (1998). Mutation of the  
978 mouse hepatocyte nuclear factor/forkhead homologue 4 gene results in an  
979 absence of cilia and random left-right asymmetry. *J. Clin. Invest.* *102*, 1077–  
980 1082.
- 981 Chen, N., Mah, A., Blacque, O.E., Chu, J., Phgora, K., Bakhoun, M.W.,  
982 Newburry, C.R.H., Khattra, J., Chan, S., Go, A., et al. (2006). Identification of  
983 ciliary and ciliopathy genes in *Caenorhabditis elegans* through comparative  
984 genomics. *Genome Biol.* *7*.
- 985 Chen, T.W., Li, H.P., Lee, C.C., Gan, R.C., Huang, P.J., Wu, T.H., Lee, C.Y.,  
986 Chang, Y.F., and Tang, P. (2014). ChIPseek, a web-based analysis tool for  
987 ChIP data. *BMC Genomics* *15*.
- 988 Choksi, S.P., Lauter, G., Swoboda, P., and Roy, S. (2014). Switching on cilia:  
989 Transcriptional networks regulating ciliogenesis. *Dev.*
- 990 Chu, J.S., Baillie, D.L., and Chen, N. (2010). Convergent evolution of RFX  
991 transcription factors and ciliary genes predated the origin of metazoans. *BMC*  
992 *Evol. Biol.* *10*.

- 993 Chu, J.S.C., Tarailo-Graovac, M., Zhang, D., Wang, J., Uyar, B., Tu, D., Trinh,  
994 J., Baillie, D.L., and Chen, N. (2012). Fine tuning of RFX/DAF-19-regulated  
995 target gene expression through binding to multiple sites in *Caenorhabditis*  
996 *elegans*. *Nucleic Acids Res.* *40*, 53–64.
- 997 Chung, M.I., Peyrot, S.M., LeBoeuf, S., Park, T.J., McGary, K.L., Marcotte,  
998 E.M., and Wallingford, J.B. (2012). RFX2 is broadly required for ciliogenesis  
999 during vertebrate development. *Dev. Biol.* *363*, 155–165.
- 1000 Davis, C.A., Hitz, B.C., Sloan, C.A., Chan, E.T., Davidson, J.M., Gabdank, I.,  
1001 Hilton, J.A., Jain, K., Baymuradov, U.K., Narayanan, A.K., et al. (2018). The  
1002 Encyclopedia of DNA elements (ENCODE): Data portal update. *Nucleic Acids*  
1003 *Res.*
- 1004 Defrance, M., Janky, R., Sand, O., and van Helden, J. (2008). Using RSAT  
1005 oligo-analysis and dyad-analysis tools to discover regulatory signals in nucleic  
1006 sequences. *Nat. Protoc.*
- 1007 Didon, L., Zwick, R.K., Chao, I.W., Walters, M.S., Wang, R., Hackett, N.R., and  
1008 Crystal, R.G. (2013). RFX3 Modulation of FOXJ1 regulation of cilia genes in the  
1009 human airway epithelium. *Respir. Res.* *14*, 1–13.
- 1010 Dubruille, R., Laurençon, A., Vandaele, C., Shishido, E., Coulon-Bublex, M.,  
1011 Swoboda, P., Couble, P., Kernan, M., and Durand, B. (2002). *Drosophila*  
1012 regulatory factor X is necessary for ciliated sensory neuron differentiation.  
1013 *Development* *129*, 5487–5498.
- 1014 Edlund, R.K., Birol, O., and Groves, A.K. (2015). The role of foxi family  
1015 transcription factors in the development of the ear and jaw. In *Current Topics in*  
1016 *Developmental Biology*, p.

- 1017 Efimenko, E., Bubb, K., Mark, H.Y., Holzman, T., Leroux, M.R., Ruvkun, G.,  
1018 Thomas, J.H., and Swoboda, P. (2005). Analysis of *xbx* genes in *C. elegans*.  
1019 *Development* 132, 1923–1934.
- 1020 Frøkjær-Jensen, C., Ailion, M., and Lockery, S.R. (2008). Ammonium-acetate is  
1021 sensed by gustatory and olfactory neurons in *Caenorhabditis elegans*. *PLoS*  
1022 *One* 3.
- 1023 Garg, A., Fitcher, B., and Leatherwood, J. (2015). A new transcription factor for  
1024 mitosis: In *Schizosaccharomyces pombe*, the RFX transcription factor Sak1  
1025 works with forkhead factors to regulate mitotic expression. *Nucleic Acids Res.*  
1026 43, 6874–6888.
- 1027 Guo, M., Wu, T.H., Song, Y.X., Ge, M.H., Su, C.M., Niu, W.P., Li, L.L., Xu, Z.J.,  
1028 Ge, C.L., Al-Mhanawi, M.T.H., et al. (2015). Reciprocal inhibition between  
1029 sensory ASH and ASI neurons modulates nociception and avoidance in  
1030 *Caenorhabditis elegans*. *Nat. Commun.*
- 1031 Gupta, S., Stamatoyannopoulos, J.A., Bailey, T.L., and Noble, W.S. (2007).  
1032 Quantifying similarity between motifs. *Genome Biol.* 8.
- 1033 Haycraft, C.J., Swoboda, P., Taulman, P.D., Thomas, J.H., and Yoder, B.K.  
1034 (2001). The *C. elegans* homolog of the murine cystic kidney disease gene  
1035 *Tg737* functions in a ciliogenic pathway and is disrupted in *osm-5* mutant  
1036 worms. *Development* 128, 1493–1505.
- 1037 Hilliard, M.A., Bargmann, C.I., and Bazzicalupo, P. (2002). *C. elegans* responds  
1038 to chemical repellents by integrating sensory inputs from the head and the tail.  
1039 *Curr. Biol.* 12, 730–734.
- 1040 Hilliard, M.A., Bergamasco, C., Arbucci, S., Plasterk, R.H.A., and Bazzicalupo,

- 1041 P. (2004). Worms taste bitter: ASH neurons, QUI-1, GPA-3 and ODR-3 mediate  
1042 quinine avoidance in *Caenorhabditis elegans*. *EMBO J.* 23, 1101–1111.
- 1043 Hobert, O. (2002). PCR fusion-based approach to create reporter Gene  
1044 constructs for expression analysis in transgenic *C. elegans*. *Biotechniques* 32,  
1045 728–730.
- 1046 Hobert, O., Moerman, D.G., Clark, K.A., Beckerle, M.C., and Ruvkun, G. (1999).  
1047 A conserved LIM protein that affects muscular adherens junction integrity and  
1048 mechanosensory function in *Caenorhabditis elegans*. *J. Cell Biol.* 144, 45–57.
- 1049 Horani, A., and Ferkol, T.W. (2021). Understanding Primary Ciliary Dyskinesia  
1050 and Other Ciliopathies. *J. Pediatr.* 230, 15-22.e1.
- 1051 Huber, W., Carey, V.J., Gentleman, R., Anders, S., Carlson, M., Carvalho, B.S.,  
1052 Bravo, H.C., Davis, S., Gatto, L., Girke, T., et al. (2015). Orchestrating high-  
1053 throughput genomic analysis with Bioconductor. *Nat. Methods*.
- 1054 Hutter, H., and Suh, J. (2016). GExplore 1.4: An expanded web interface for  
1055 queries on *Caenorhabditis elegans* protein and gene function . *Worm* 5,  
1056 e1234659.
- 1057 Kalderon, D., Roberts, B.L., Richardson, W.D., and Smith, A.E. (1984). A short  
1058 amino acid sequence able to specify nuclear location. *Cell* 39, 499–509.
- 1059 Kaplan, J.M., and Horvitz, H.R. (1993). A dual mechanosensory and  
1060 chemosensory neuron in *Caenorhabditis elegans*. *Proc. Natl. Acad. Sci. U. S.*  
1061 *A.* 90, 2227–2231.
- 1062 Khan, A., Fornes, O., Stigliani, A., Gheorghe, M., Castro-Mondragon, J.A., Van  
1063 Der Lee, R., Bessy, A., Chèneby, J., Kulkarni, S.R., Tan, G., et al. (2018).  
1064 JASPAR 2018: Update of the open-access database of transcription factor

- 1065 binding profiles and its web framework. *Nucleic Acids Res.*
- 1066 Kim, H., Ishidate, T., Ghanta, K.S., Seth, M., Conte, D., Shirayama, M., and  
1067 Mello, C.C. (2014). A Co-CRISPR strategy for efficient genome editing in  
1068 *Caenorhabditis elegans*. *Genetics* 197, 1069–1080.
- 1069 Kinsella, R.J., Kähäri, A., Haider, S., Zamora, J., Proctor, G., Spudich, G.,  
1070 Almeida-King, J., Staines, D., Derwent, P., Kerhornou, A., et al. (2011).  
1071 Ensembl BioMart: A hub for data retrieval across taxonomic space. *Database*.
- 1072 Kuleshov, M. V., Jones, M.R., Rouillard, A.D., Fernandez, N.F., Duan, Q.,  
1073 Wang, Z., Koplev, S., Jenkins, S.L., Jagodnik, K.M., Lachmann, A., et al.  
1074 (2016). Enrichr: a comprehensive gene set enrichment analysis web server  
1075 2016 update. *Nucleic Acids Res.*
- 1076 Larroux, C., Luke, G.N., Koopman, P., Rokhsar, D.S., Shimeld, S.M., and  
1077 Degnan, B.M. (2008). Genesis and expansion of metazoan transcription factor  
1078 gene classes. *Mol. Biol. Evol.* 25, 980–996.
- 1079 Lewis, M., and Stracker, T.H. (2020). Transcriptional regulation of multiciliated  
1080 cell differentiation. *Semin. Cell Dev. Biol.* 110, 51–60.
- 1081 Li, J.B., Gerdes, J.M., Haycraft, C.J., Fan, Y., Teslovich, T.M., May-Simera, H.,  
1082 Li, H., Blacque, O.E., Li, L., Leitch, C.C., et al. (2004). Comparative genomics  
1083 identifies a flagellar and basal body proteome that includes the BBS5 human  
1084 disease gene. *Cell* 117, 541–552.
- 1085 Li, W., Kang, L., Piggott, B.J., Feng, Z., and Xu, X.Z.S. (2011b). The neural  
1086 circuits and sensory channels mediating harsh touch sensation in  
1087 *Caenorhabditis elegans*. *Nat. Commun.* 2.
- 1088 Liu, Y., Pathak, N., Kramer-Zucker, A., and Drummond, I.A. (2007). Notch



1089 signaling controls the differentiation of transporting epithelia and multiciliated  
1090 cells in the zebrafish pronephros. *Development* 134, 1111–1122.

1091 Lucas, J.S., Davis, S.D., Omran, H., and Shoemark, A. (2020). Primary ciliary  
1092 dyskinesia in the genomics age. *Lancet Respir. Med.* 8.

1093 Margie, O., Palmer, C., and Chin-Sang, I. (2013). *C. elegans* chemotaxis assay.  
1094 *J. Vis. Exp.*

1095 Mello, C.C., Kramer, J.M., Stinchcomb, D., and Ambros, V. (1991). Efficient  
1096 gene transfer in *C.elegans*: extrachromosomal maintenance and integration of  
1097 transforming sequences. *EMBO J.* 10, 3959–3970.

1098 Mitchell, D.R. (2017). Evolution of cilia. *Cold Spring Harb. Perspect. Biol.* 9.

1099 Mukhopadhyay, A., Deplancke, B., Walhout, A.J.M., and Tissenbaum, H.A.  
1100 (2005). *C. elegans* *tubby* regulates life span and fat storage by two independent  
1101 mechanisms. *Cell Metab.* 2, 35–42.

1102 Mukhopadhyay, S., Lu, Y., Qin, H., Lanjuin, A., Shaham, S., and Sengupta, P.  
1103 (2007). Distinct IFT mechanisms contribute to the generation of ciliary structural  
1104 diversity in *C. elegans*. *EMBO J.* 26, 2966–2980.

1105 Nakagawa, S., Gisselbrecht, S.S., Rogers, J.M., Hartl, D.L., and Bulyk, M.L.  
1106 (2013). DNA-binding specificity changes in the evolution of forkhead  
1107 transcription factors. *Proc. Natl. Acad. Sci. U. S. A.* 110, 12349–12354.

1108 Narasimhan, K., Lambert, S.A., Yang, A.W.H., Riddell, J., Mnaimneh, S.,  
1109 Zheng, H., Albu, M., Najafabadi, H.S., Reece-Hoyes, J.S., Fuxman Bass, J.I., et  
1110 al. (2015). Mapping and analysis of *Caenorhabditis elegans* transcription factor  
1111 sequence specificities. *Elife.*

1112 Packer, J.S., Zhu, Q., Huynh, C., Sivaramakrishnan, P., Preston, E., Dueck, H.,

- 1113 Stefanik, D., Tan, K., Trapnell, C., Kim, J., et al. (2019a). A lineage-resolved  
1114 molecular atlas of *C. elegans* embryogenesis at single-cell resolution . *Science*  
1115 (80-. ). 365.
- 1116 Perkins, L., Hedgecock, E., Thomson, J., and Culotti, J. (1986). Mutant sensory  
1117 cilia in the nematode *C. elegans*. *Dev. Biol.* 117, 456–487.
- 1118 Piasecki, B.P., Burghoorn, J., and Swoboda, P. (2010). Regulatory Factor X  
1119 (RFX)-mediated transcriptional rewiring of ciliary genes in animals. *Proc. Natl.*  
1120 *Acad. Sci. U. S. A.* 107, 12969–12974.
- 1121 Pierrou, S., Hellqvist, M., Samuelsson, L., Enerbäck, S., and Carlsson, P.  
1122 (1994). Cloning and characterization of seven human forkhead proteins:  
1123 Binding site specificity and DNA bending. *EMBO J.* 13, 5002–5012.
- 1124 Quigley, I.K., and Kintner, C. (2017). Rfx2 Stabilizes Foxj1 Binding at Chromatin  
1125 Loops to Enable Multiciliated Cell Gene Expression. *PLoS Genet.* 13, 1–29.
- 1126 Robinson, J.T., Thorvaldsdóttir, H., Winckler, W., Guttman, M., Lander, E.S.,  
1127 Getz, G., and Mesirov, J.P. (2011). Integrative genomics viewer. *Nat.*  
1128 *Biotechnol.*
- 1129 Sambongi, Y., Nagae, T., Liu, Y., Yoshimizu, T., Takeda, K., Wada, Y., and  
1130 Futai, M. (1999). Sensing of cadmium and copper ions by externally exposed  
1131 ADL, ASE, and ASH neurons elicits avoidance response in *Caenorhabditis*  
1132 *elegans*. *Neuroreport* 10, 753–757.
- 1133 Sawin, E., Ranganathan, R., and Horvitz, H. (2000). *C. elegans* locomotory rate  
1134 is modulated by the environment through a dopaminergic pathway and by  
1135 experience through a serotonergic pathway. *Neuron*.
- 1136 Schiebinger, G., Shu, J., Tabaka, M., Cleary, B., Subramanian, V., Solomon, A.,

- 1137 Gould, J., Liu, S., Lin, S., Berube, P., et al. (2019). Optimal-Transport Analysis  
1138 of Single-Cell Gene Expression Identifies Developmental Trajectories in  
1139 Reprogramming. *Cell* 176, 928-943.e22.
- 1140 Schindelin, J., Arg, I., Arganda-Carreras, I., a-Carreras, Frise, E., Kaynig, V.,  
1141 Longair, M., Pietzsch, T., Preibisch, S., Rueden, C., et al. (2012). Fiji: an open-  
1142 source platform for biological-image analysis. *Nat. Methods*.
- 1143 Scholey, J. (2007). The sensory cilia of *Caenorhabditis elegans*\_Revised.  
1144 *WormBook* 8, 2903–2915.
- 1145 Sengupta, P., Chou, J.H., and Bargmann, C.I. (1996). odr-10 Encodes a seven  
1146 transmembrane domain olfactory receptor required for responses to the odorant  
1147 diacetyl. *Cell* 84, 899–909.
- 1148 Senti, G., and Swoboda, P. (2008). Distinct isoforms of the RFX transcription  
1149 factor DAF-19 regulate ciliogenesis and maintenance of synaptic activity. *Mol.*  
1150 *Biol. Cell*.
- 1151 Shapiro, S.S., and Martin, B.W. (1965). An Analysis of Variance Test for  
1152 Normality. *Biometrika*.
- 1153 Shimeld, S.M., Degnan, B., and Luke, G.N. (2010). Evolutionary genomics of  
1154 the Fox genes: Origin of gene families and the ancestry of gene clusters.  
1155 *Genomics* 95, 256–260.
- 1156 Sorrells, T.R., Johnson, A.N., Howard, C.J., Britton, C.S., Fowler, K.R.,  
1157 Feigerle, J.T., Weil, P.A., and Johnson, A.D. (2018). Intrinsic cooperativity  
1158 potentiates parallel cis-regulatory evolution. *Elife* 7, 1–29.
- 1159 Starich, T.A., Herman, R.K., Kari, C.K., Yeh, W.H., Schackwitz, W.S., Schuyler,  
1160 M.W., Collet, J., Thomas, J.H., and Riddle, D.L. (1995). Mutations affecting in

- 1161 chemosensory neurons of *Caenorhabditis elegans*. *Genetics* *139*, 171–188.
- 1162 Stasio, E.A. De, Mueller, K.P., Bauer, R.J., Hurlburt, A.J., Bice, S.A., Scholtz,  
1163 S.L., Phirke, P., Sugiaman-trapman, D., Stinson, L.A., and Swoboda, P. (2018).  
1164 An Expanded Role for the RFX Transcription Factor. *Genetics* *208*, 1083–1097.
- 1165 Stefanakis, N., Carrera, I., and Hobert, O. (2015). Regulatory Logic of Pan-  
1166 Neuronal Gene Expression in *C. elegans*. *Neuron*.
- 1167 Stubbs, J.L., Oishi, I., Izpisua Belmonte, J.C., and Kintner, C. (2008). The  
1168 forkhead protein Foxj1 specifies node-like cilia in *Xenopus* and zebrafish  
1169 embryos. *Nat. Genet.* *40*, 1454–1460.
- 1170 Swoboda, P., Adler, H.T., and Thomas, J.H. (2000). The RFX-type transcription  
1171 factor DAF-19 regulates sensory neuron cilium formation in *C. Elegans*. *Mol.*  
1172 *Cell*.
- 1173 Tarashansky, A.J., Musser, J.M., Khariton, M., Li, P., Arendt, D., Quake, S.R.,  
1174 and Wang, B. (2021). Mapping single-cell atlases throughout metazoa unravels  
1175 cell type evolution. *Elife* *10*, 1–24.
- 1176 Taylor, S.R., Santpere, G., Weinreb, A., Barrett, A., Reilly, M.B., Xu, C., Varol,  
1177 E., Oikonomou, P., Glenwinkel, L., McWhirter, R., et al. (2021). Molecular  
1178 topography of an entire nervous system. *Cell*.
- 1179 Thevenon, J., Duplomb, L., Phadke, S., Eguether, T., Saunier, A., Avila, M.,  
1180 Carmignac, V., Bruel, A.L., St-Onge, J., Duffourd, Y., et al. (2016). Autosomal  
1181 recessive IFT57 hypomorphic mutation cause ciliary transport defect in  
1182 unclassified oral–facial–digital syndrome with short stature and  
1183 brachymesophalangia. *Clin. Genet.* *90*, 509–517.
- 1184 Thomas-Chollier, M., Herrmann, C., Defrance, M., Sand, O., Thieffry, D., and

- 1185 Van Helden, J. (2012a). RSAT peak-motifs: Motif analysis in full-size ChIP-seq  
1186 datasets. *Nucleic Acids Res.*
- 1187 Thomas-Chollier, M., Darbo, E., Herrmann, C., Defrance, M., Thieffry, D., and  
1188 Van Helden, J. (2012b). A complete workflow for the analysis of full-size ChIP-  
1189 seq (and similar) data sets using peak-motifs. *Nat. Protoc.*
- 1190 Thomas, J., Morlé, L., Soulavie, F., Laurençon, A., Sagnol, S., and Durand, B.  
1191 (2010). Transcriptional control of genes involved in ciliogenesis: a first step in  
1192 making cilia. *Biol. Cell* *102*, 499–513.
- 1193 Tobin, J.L., and Beales, P.L. (2009). The nonmotile ciliopathies. *Genet. Med.*
- 1194 Troemel, E.R., Kimmel, B.E., and Bargmann, C.I. (1997). Reprogramming  
1195 chemotaxis responses: Sensory neurons define olfactory preferences in *C.*  
1196 *elegans*. *Cell* *91*, 161–169.
- 1197 Turatsinze, J.V., Thomas-Chollier, M., Defrance, M., and van Helden, J. (2008).  
1198 Using RSAT to scan genome sequences for transcription factor binding sites  
1199 and cis-regulatory modules. *Nat. Protoc.*
- 1200 Wagner, G.P. (2015). Two rules for the detection and quantification of epistasis  
1201 and other interaction effects. *Methods Mol. Biol.*
- 1202 Weirauch, M.T., Yang, A., Albu, M., Cote, A.G., Montenegro-Montero, A.,  
1203 Drewe, P., Najafabadi, H.S., Lambert, S.A., Mann, I., Cook, K., et al. (2014).  
1204 Determination and inference of eukaryotic transcription factor sequence  
1205 specificity. *Cell* *158*, 1431–1443.
- 1206 Yu, G., Wang, L.G., and He, Q.Y. (2015). ChIP seeker: An R/Bioconductor  
1207 package for ChIP peak annotation, comparison and visualization.  
1208 *Bioinformatics.*

1209 Yu, X., Ng, C.P., Habacher, H., and Roy, S. (2008). Foxj1 transcription factors  
1210 are master regulators of the motile ciliogenic program. *Nat. Genet.* *40*, 1445–  
1211 1453.

1212 Zeisel, A., Hochgerner, H., Lönnerberg, P., Johnsson, A., Memic, F., van der  
1213 Zwan, J., Häring, M., Braun, E., Borm, L.E., La Manno, G., et al. (2018).  
1214 Molecular Architecture of the Mouse Nervous System. *Cell*.

1215 Zhang, C., Zhao, N., Chen, Y., Zhang, D., Yan, J., Zou, W., Zhang, K., and  
1216 Huang, X. (2016). The signaling pathway of *Caenorhabditis elegans* mediates  
1217 chemotaxis response to the attractant 2-heptanone in a Trojan Horse-like  
1218 pathogenesis. *J. Biol. Chem.* *291*, 23618–23627.

1219

1220

1221

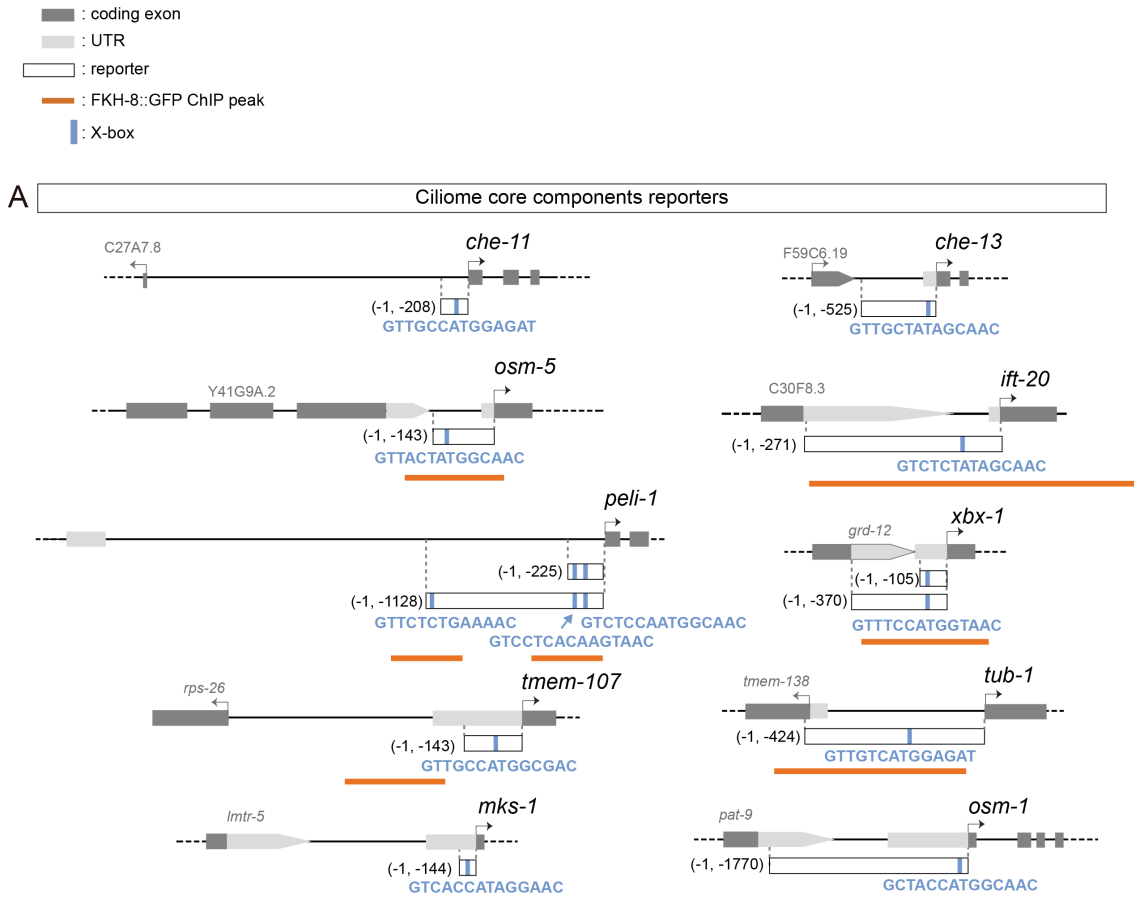

## Supplementary Figure 1

### Supplementary Figure 1. Ciliome reporters used in this work.

Schematic representation of reporter constructs used in the manuscript. Selected core cilia components contain at least one experimentally validated X-box motif in their sequences (marked as a blue bar). For *che-11*, *che-13*, *osm5*, *ift-20*, *tub-1*, *mks-1* and *osm-1* see (Efimenko et al., 2005); for *peli-1* see (Chu et al., 2012), for *xbx-1* see (Schafer et al., 2003); for *tmem-107* see (Lambacher et al., 2016). Overlap between x-boxes and FKH-8 binding sites is found for *osm-5*, *ift-20*, *peli-1*, *xbx-1*, *tub1* and *osm-1*.



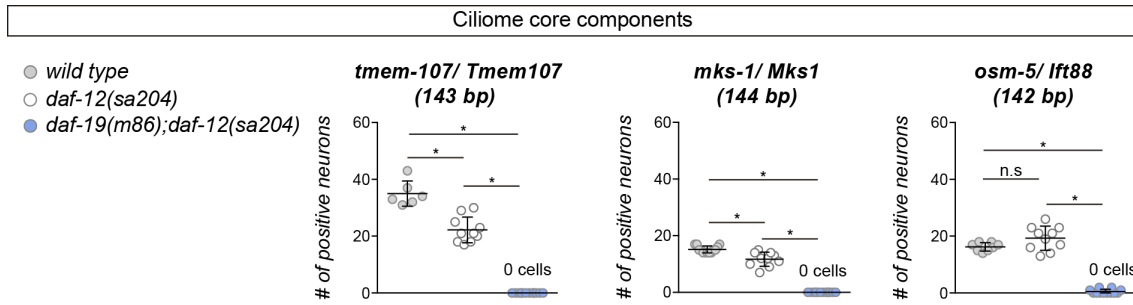

## Supplementary Figure 2

### Supplementary Figure 2. Lack of *daf-19* affects core ciliome expression.

Expression of short reporters for the core cilia components *tmem-107*, *mks-1* and *osm-5* is completely abolished in double *daf-12(sa204); daf-19(m86)* null mutants. *daf-12(sa204)* single mutants show slight but significant defects in *tmem-107* and *mks-1* reporter expression, and also for *che-13*, *ift-20* and *osm-1* (not shown in the graph).

Each dot represents the total number of reporter-positive neurons scored in a single animal. Mean and standard deviation are represented. See **Supplementary file 1** for raw scoring data in all genetic backgrounds and for all reporters.

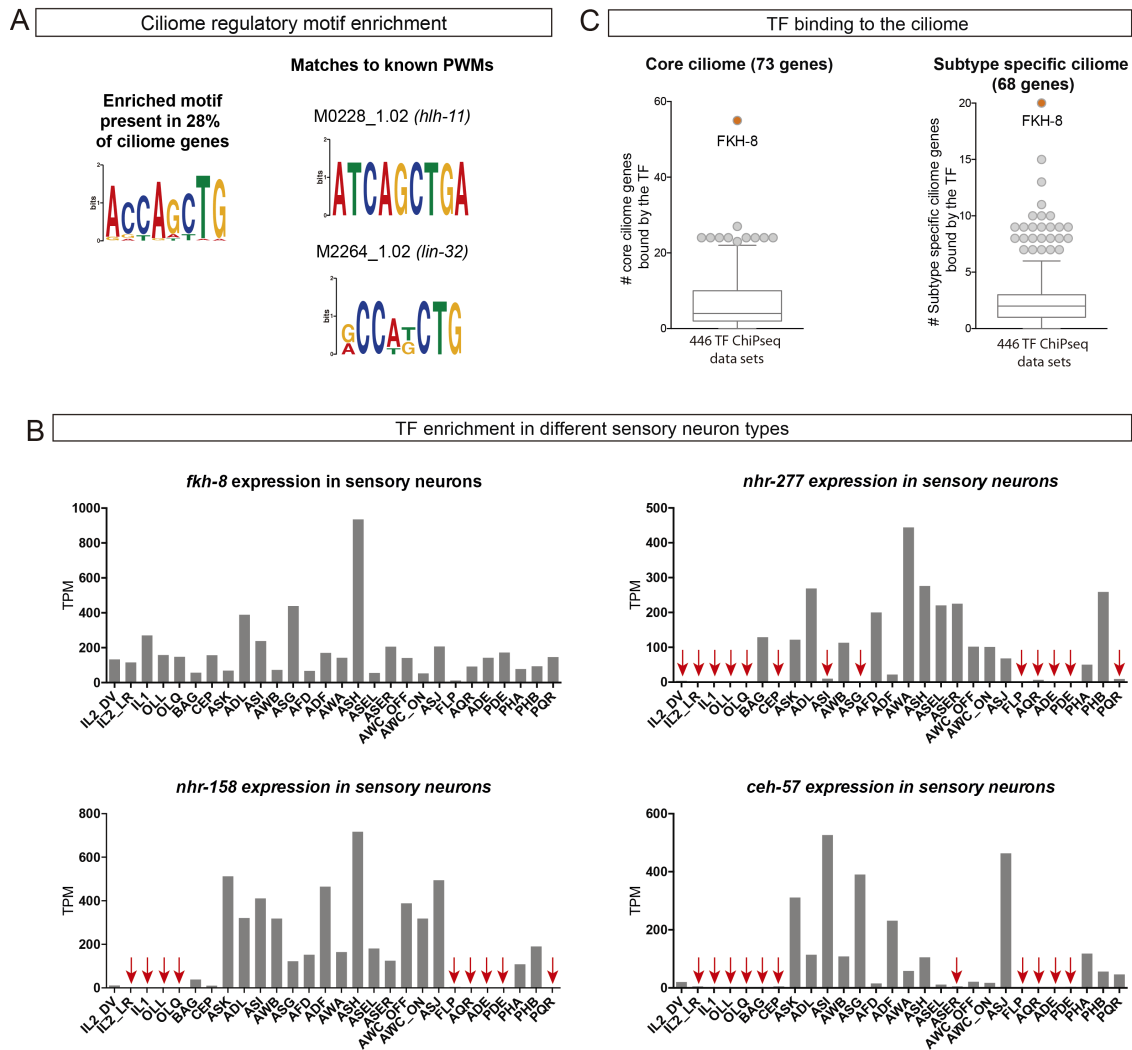

Supplementary Figure 3

**Supplementary Figure 3. Available -omics data identifies FKH-8 as a candidate transcriptional regulator of ciliome genes in *C. elegans*.**

A) *De novo* motif enrichment analysis of putative regulatory sequences of ciliome genes identifies a motif matching known binding site for the bHLH TFs *lin-32* and *hlh-11*.

B) sc-RNA-seq data of FACS-isolated neurons from L4 hermaphrodites (Taylor et al., 2021) show broad expression for *ceh-57*, *fkh-8*, *nhr-158* and *nhr-277* TFs across the whole ciliated system of *C. elegans*. Only *fkh-8* expression is detected in all ciliated neuron types. Red arrows indicate values lower than 10 TPM (transcripts per million).

C) ChIP-seq data analysis shows FKH-8 ranks first among 259 TFs directly binding to either core ciliome genes (left) or subtype-specific ciliary features (right).

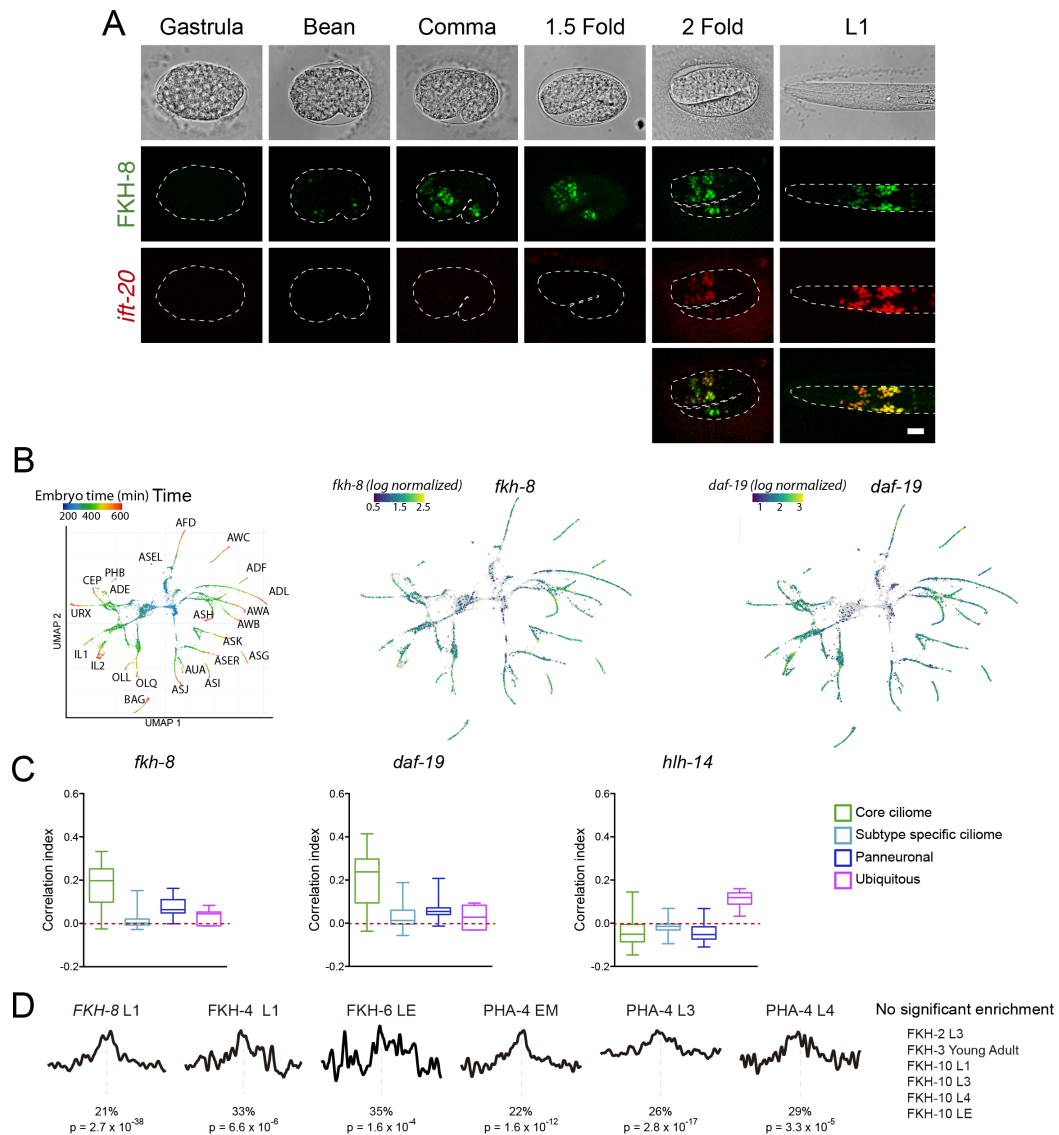

## Supplementary Figure 4

### Supplementary Figure 4. *fkh-8* expression along development of the ciliated system.

A) Representative images of developmental embryonic milestones until hatching (L1) in animals expressing both a fosmid-based reporter for *fkh-8* (in green) and an integrated reporter for the panciliary marker *ift-20* (in red). Note that due to long maturation time of the tag-RFP reporter, *ift-20::tagRFP* expression is only detected from the 2 fold stage, while *ift-20::gfp* reporter in **Figure 2** is first detected at bean stage, similar to *fkh-8* expression. Scale bar = 10  $\mu$ m.

B) Embryonic sc-RNA-seq data (Packer et al., 2019) from *C. elegans* ciliated neurons. Pseudo-time (left panel) shows the maturation trajectory of ciliated neurons that coincides with increasing *fkh-8* (centre) and *daf-19* (right) expression.

C) Correlation index between *fkh-8*, *daf-19* and *hlh-14* TF scRNAseq expression and genes divided in four different categories (core ciliome, subtype ciliome, panneuronal or ubiquitous) for all the ciliated lineages (Packer et al., 2019). *fkh-8* and *daf-19* expression shows high correlation index with core ciliome genes but not for other gene categories, while *hlh-14*, bHLH TF not involved in ciliogenesis shows low correlation values in all categories. See **Supplementary file 2** for raw data.

D) Presence of DAF-19/RFX binding motifs is less significantly or not significantly enriched in ChIP-seq datasets for other FKH TFs. See **Supplementary file 2** for detailed data.

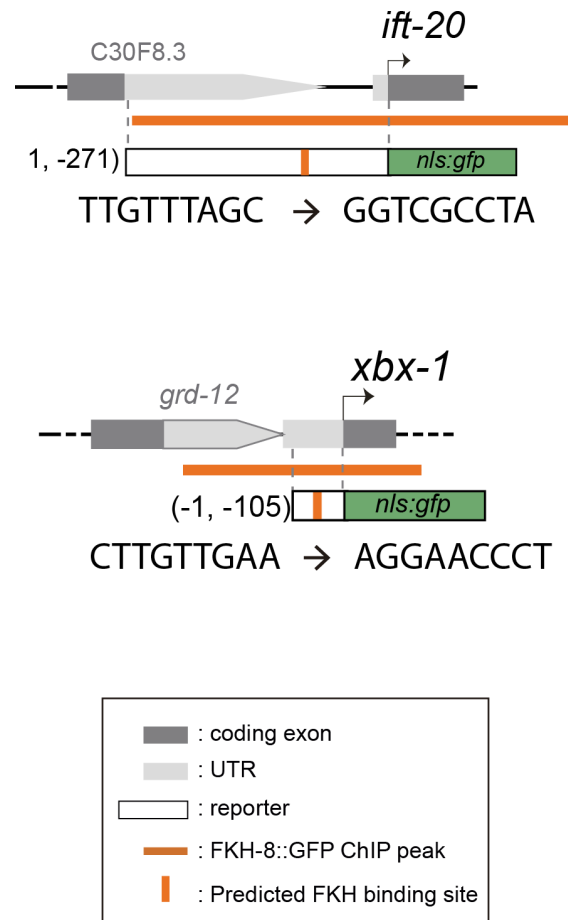

## Supplementary Figure 5

### Supplementary Figure 5. *cis*-mutation of putative FKH sites of two core ciliome components.

Schematics for the *ift-20* and *xbx-1* loci and reporters. Dark grey boxes represent exons whereas light grey boxes correspond to UTRs. FKH-8 peaks are depicted with an orange horizontal line while predicted FKH DNA binding motifs are indicated with a vertical orange bar. Sequences corresponding to *wild type* and mutated putative FKH sites are indicated. See **Supplementary file 1** for raw scoring data and **Supplementary file 2** for FKH putative binding site assignment.

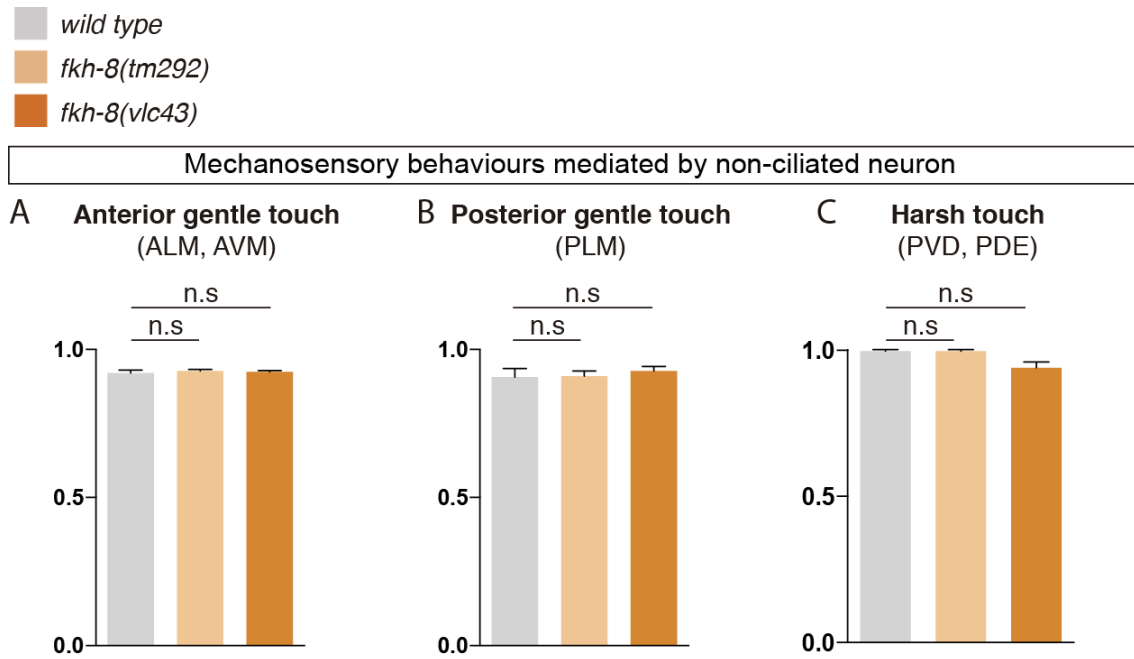

## Supplementary Figure 6

### Supplementary Figure 6. FKH-8 is not required for correct display of mechanosensory behaviours mediated by non-ciliated neurons.

A to C) *fkh-8* mutants show normal avoidance behaviours elicited by mechanical stimuli known as gentle touch and harsh touch paradigms, suggesting FKH-8 is not required for the correct functionality of non-ciliated neurons ALM, AVM, PLM and PVD. Redundant actions of PVD and PDE controlling scape response to harsh touch prevent to assess defects about the functionality of ciliated PDE neurons. Mean and standard deviation are represented. See **Supplementary file 3** for raw data and samples' sizes.

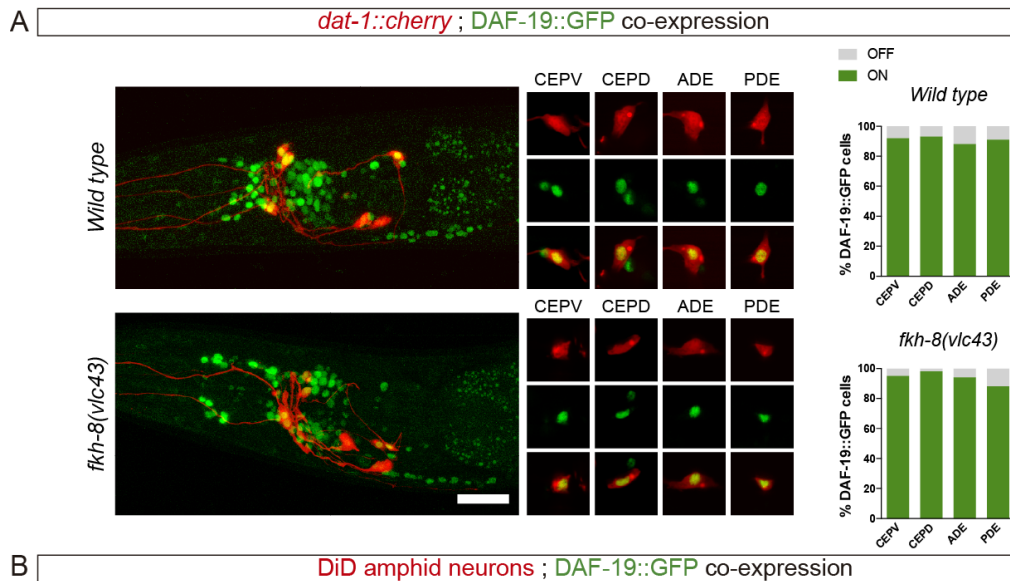

## Supplementary Figure 7

### Supplementary Figure 7. Lack of FKH-8 has no major effect on DAF-19 expression.

A) Representative lateral views from heads of young adult hermaphrodites co-expressing a fosmid-based DAF-19::GFP reporter and *dat-1::mcherry* reporter labelling the dopaminergic neurons. Lack of FKH-8 does not seem to affect DAF-19::GFP expression pattern. Co-localization analysis shows normal expression in the dopaminergic ciliated neurons (CEPV, CEPD, ADE, PDE), quantified in the graphs. Scale bar = 20  $\mu$ m. See **Supplementary file 1** for raw data and samples' sizes.

B) *daf-19* expression is largely unaffected in the subpopulation of DiD-positive ciliated amphid neurons in null *fkh-8* mutant animals. DAF-19::GFP is consistently detected in the ASI, ADL and AWB neurons in both *wild type* and null *fkh-8* mutant backgrounds. Mean and standard deviation are represented. N = 10 animals.
